# Supplementary material for: Single-cell transcriptomics of human iPSC differentiation dynamics reveal a core molecular network of Parkinson’s disease
Source: PubMed Central journal article supplement (PMC8758783; doi:10.1038/s42003-021-02973-7), 2022-01-13
Supplement: 42003_2021_2973_MOESM2_ESM.pdf [file 42003_2021_2973_MOESM2_ESM.pdf]

## Supplementary material to:

### Single-cell transcriptomics of human iPSC differentiation dynamics reveal a core molecular network of Parkinson's disease

Gabriela Novak<sup>1+,2,3\*</sup>, Dimitrios Kyriakis<sup>1</sup>, Kamil Grzyb<sup>1</sup>, Michela Bernini<sup>1</sup>, Sophie Rodius<sup>4</sup>, Gunnar Dittmar<sup>4,5</sup>,  
Steven Finkbeiner<sup>3</sup>, and Alexander Skupin<sup>1,6\*</sup>

1. The Integrative Cell Signalling Group, Luxembourg Centre for Systems Biomedicine (LCSB), University of Luxembourg, Esch-sur-Alzette, Luxembourg.
2. Luxembourg Institute of Health (LIH), Esch-sur-Alzette, Luxembourg
3. Gladstone Institutes and Neurology and Physiology Department, UC San Francisco San Francisco, CA 94158, USA
4. Quantitative Biology Unit, Luxembourg Institute of Health, Strassen, Luxembourg
5. Department of Life Sciences and Medicine, University of Luxembourg, L-4367 Belvaux, Luxembourg
6. University of California San Diego, La Jolla, CA 92093, USA

+ Primary affiliation

\* Corresponding authors, email: [gabriela.novak@alumni.utoronto.ca](mailto:gabriela.novak@alumni.utoronto.ca);

[alexander.skupin@uni.lu](mailto:alexander.skupin@uni.lu)

|                                                                                                                                                                                                                                                                                                                                    |                                                                                                                                       |
|------------------------------------------------------------------------------------------------------------------------------------------------------------------------------------------------------------------------------------------------------------------------------------------------------------------------------------|---------------------------------------------------------------------------------------------------------------------------------------|
| Day -1                                                                                                                                                                                                                                                                                                                             | Plate iPSCs at 1.5 to double confluent density in MTeSR with ROCK inhibitor, remove ROCK inhibitor after ±8 hours                     |
| Day 0                                                                                                                                                                                                                                                                                                                              | SRM, LDN193189 (100nM), SB431542 (10 μM)                                                                                              |
| Day 1-2                                                                                                                                                                                                                                                                                                                            | SRM, LDN193189 (100nM), SB431542 (10 μM), SHH (100ng/ml), Purmorphamine (2 μM), FGF-8b (100ng/ml)                                     |
| Day 3-4                                                                                                                                                                                                                                                                                                                            | SRM, LDN193189 (100nM), SB431542 (10μM), SHH (100ng/ml), Purmorphamine (2μM), FGF-8b (100ng/ml), CHIR (3μM)                           |
| Day 5-6                                                                                                                                                                                                                                                                                                                            | 75% SRM/25% N2 with LDN193189 (100nM), SHH (100ng/ml), Purmorphamine (2 μM), FGF-8b (100ng/ml), CHIR (3 μM)                           |
| Day 7-8                                                                                                                                                                                                                                                                                                                            | 50% SRM/50% N2 with LDN193189 (100nM), SHH (100ng/ml), CHIR (3 μM)                                                                    |
| Day 9-10                                                                                                                                                                                                                                                                                                                           | 25% SRM/75% N2 with LDN193189 (100nM), SHH (100ng/ml), CHIR (3 μM)                                                                    |
| Day 11-12                                                                                                                                                                                                                                                                                                                          | NB/B27, CHIR (3 μM), BDNF (20ng/ml), AA (0.2mM), GDNF (20ng/ml), cAMP (1mM), TGFB3 (1ng/ml), DAPT (10 μM)                             |
| Day 13-20                                                                                                                                                                                                                                                                                                                          | NB/B27 with BDNF (20ng/ml), AA (0.2mM), GDNF (20ng/ml), cAMP (1mM), TGFB3 (1ng/ml), DAPT (10 μM)                                      |
| Day 21                                                                                                                                                                                                                                                                                                                             | Dissociate using Accutase and passage 1:1 onto poly-L-ornithine/fibronectin/laminin-coated dishes.                                    |
| Day 25                                                                                                                                                                                                                                                                                                                             | Passage again using Accutase, onto to poly-L-ornithine/fibronectin/laminin-coated dishes at about 3x10 <sup>6</sup> cells/6-well well |
| Day 26+                                                                                                                                                                                                                                                                                                                            | NB/B27 with BDNF (20ng/ml), AA (0.2mM), GDNF (20ng/ml), cAMP (1mM), TGFB3 (1ng/ml), DAPT (10 μM)                                      |
| SRM media contains 410 mL of Knockout DMEM (Invitrogen; cat. no. 10829-018), 75 mL Knockout Serum Replacement (Invitrogen, cat. no. 10828-028), 5 mL L-glutamine (200 mM, Invitrogen, cat. no. 25030-081), 5 mL MEM NEAA (Invitrogen, cat. no. 11140-050), and 0.5 mL of 1000x 2-mercaptoethanol (Invitrogen, cat. no. 21985-023). |                                                                                                                                       |
| N2 media contains 470 mL of Neurobasal media, 5 mL L-glutamine (200 mM, Invitrogen, cat. no. 25030-081), N2 supplement (17502048), B27 supplement (12587010), 1% penicillin/streptomycin                                                                                                                                           |                                                                                                                                       |
| NB/B27 media contains 470 mL of Neurobasal media (Life Technologies Europe, 21103049), B27 supplement, 1% penicillin/streptomycin                                                                                                                                                                                                  |                                                                                                                                       |

**Supplementary Table 1. The mDA differentiation protocol.** Timing of the differentiation protocol and differentiation factor concentrations used. SRM, N2 and NB/B27 refers to media protocols listed at the bottom of the table. Please note that significant modifications were made to the original protocol published by Kriks, S. et al.<sup>1-3</sup>

| Differentiation timing and sample collection |           |            |                     |                     |                 |           |            |                     |                     |
|----------------------------------------------|-----------|------------|---------------------|---------------------|-----------------|-----------|------------|---------------------|---------------------|
| Control cell line                            |           |            |                     |                     | PINK1 cell line |           |            |                     |                     |
|                                              |           |            |                     | Plating<br>Recovery |                 |           |            |                     | Plating<br>Recovery |
|                                              |           |            |                     | <b>D0</b>           |                 |           |            |                     | <b>D0</b>           |
|                                              |           |            |                     | D1                  |                 |           |            |                     | D1                  |
|                                              |           |            |                     | D2                  |                 |           |            |                     | D2                  |
|                                              |           |            |                     | D3                  |                 |           |            |                     | D3                  |
|                                              |           |            |                     | D4                  |                 |           |            |                     | D4                  |
|                                              |           |            | Plating<br>Recovery | D5                  |                 |           |            | Plating<br>Recovery | D5                  |
|                                              |           |            |                     | <b>D0</b>           |                 |           |            |                     | <b>D0</b>           |
|                                              |           |            |                     | D1                  |                 |           |            |                     | D1                  |
|                                              |           |            |                     | D2                  |                 |           |            |                     | D2                  |
|                                              |           |            |                     | D3                  |                 |           |            |                     | D3                  |
|                                              |           |            | Plating<br>Recovery | D4                  |                 |           |            | Plating<br>Recovery | D4                  |
|                                              |           |            |                     | <b>D0</b>           |                 |           |            |                     | <b>D0</b>           |
|                                              |           |            |                     | D1                  |                 |           |            |                     | D1                  |
|                                              |           |            |                     | D2                  |                 |           |            |                     | D2                  |
|                                              |           |            |                     | D3                  |                 |           |            |                     | D3                  |
|                                              |           |            | Plating<br>Recovery | D4                  |                 |           |            | Plating<br>Recovery | D4                  |
|                                              |           |            |                     | <b>D0</b>           |                 |           |            |                     | <b>D0</b>           |
|                                              |           |            |                     | D1                  |                 |           |            |                     | D1                  |
|                                              |           |            |                     | D2                  |                 |           |            |                     | D2                  |
|                                              |           |            |                     | D3                  |                 |           |            |                     | D3                  |
|                                              |           |            | Plating<br>Recovery | D4                  |                 |           |            | Plating<br>Recovery | D4                  |
|                                              |           |            |                     | <b>D0</b>           |                 |           |            |                     | <b>D0</b>           |
|                                              |           |            |                     | D1                  |                 |           |            |                     | D1                  |
|                                              |           |            |                     | D2                  |                 |           |            |                     | D2                  |
|                                              |           |            |                     | D3                  |                 |           |            |                     | D3                  |
|                                              |           |            |                     | D4                  |                 |           |            |                     | D4                  |
|                                              |           |            | Plating<br>Recovery | D5                  |                 |           |            | Plating<br>Recovery | D5                  |
|                                              |           |            |                     | <b>D0</b>           |                 |           |            |                     | <b>D0</b>           |
|                                              |           |            |                     | D1                  |                 |           |            |                     | D1                  |
|                                              |           |            |                     | D2                  |                 |           |            |                     | D2                  |
|                                              |           |            |                     | D3                  |                 |           |            |                     | D3                  |
|                                              |           |            |                     | D4                  |                 |           |            |                     | D4                  |
|                                              |           |            |                     | D5                  |                 |           |            |                     | D5                  |
| Propagated                                   | D4        | D8         | D13                 | D19                 | Propagated      | D4        | D8         | D13                 | D19                 |
| iPSC culture                                 | D5        | D9         | D14                 | D20                 | iPSC culture    | D5        | D9         | D14                 | D20                 |
| <b>iPSC</b>                                  | <b>D6</b> | <b>D10</b> | <b>D15</b>          | <b>D21</b>          | <b>iPSC</b>     | <b>D6</b> | <b>D10</b> | <b>D15</b>          | <b>D21</b>          |

Collection of samples & single cell analysis

**Supplementary Table 2. Timeline of sample generation and collection.** See Supplementary Fig. 1 for differentiation protocol from D0 to D21. Between plating for differentiation, iPSC cells were maintained in the MTeSR media (STEMCELL Technologies Inc.) and expanded to generate a sufficient number of cells for the next plating round. At each collection point, three 12-well plate wells were collected for qPCR (as independent biological replicates) and fourth was used for single-cell analysis (sc-RNAseq). Additional two wells were replated at D21, one at (1:1) and one onto a 96-well plate, the 96-well plate was fixed and stained at D25. At D25 the last well was replated onto a second 96-well plate, then fixed and stained at D35. Each sample was differentiated independently, as an independent biological replicate, from cells of a different passage number, since these were propagated in culture, until the next starting point.

| mDA differentiation stages |                        |                               |                     |
|----------------------------|------------------------|-------------------------------|---------------------|
| Stage 1                    | Stage 2                | Stage 3                       | Stage 4             |
| Regional specification     | Flloor Plate VM DA NPs | Differentiating VM DA neurons | Differentiated mDAs |
| OTX2                       | LMX1A                  | NGN2 (Neurog)                 | SLC18A2 (VMAT2)     |
| WNT1                       | FOXA2                  | NR4A2 (Nurr1)                 | SLC6A3 (DAT)        |
| EN 1/2                     | MSX1                   | PITX3                         | ALDH1A1             |
| LMX1B                      |                        | TH                            | KCNJ6 (GIRK2)       |
|                            |                        |                               | SNCA (a-synuclein)  |

| Expression modules |       |       |         |         |
|--------------------|-------|-------|---------|---------|
| IPSCs              | Rgl   | Prog  | NProg   | DA      |
| POU5F1             | FABP7 | SOX2  | SOX2    | FOXA2   |
| L1TD1              | SOX2  | FOXA2 | FOXA2   | LMX1A   |
| USP44              | FOXA2 | LMX1A | OTX2    | TBB3    |
| TDGF-1             | LMX1A | OTX2  | WNT5A   | DDC     |
| POLR3G             | OTX2  | WNT5A | ASCL1   | DCX     |
| TERF1              | WNT5A | CORIN | NEUROD1 | NR4A2   |
| IFITM1             | RSPO2 | DDC   | NEUROG2 | PBX1    |
| MYC                | MSX1  |       | TBB3    | PITX3   |
|                    | SOX6  |       | DDC     | EN1     |
|                    | FABP7 |       | DCX     | TH      |
|                    | CORIN |       |         | BNC2    |
|                    | BNC2  |       |         | SLC18A2 |
|                    |       |       |         | SLC6A3  |
|                    |       |       |         | LM03    |
|                    |       |       |         | ALDH1A1 |
|                    |       |       |         | SOX6    |

**Supplementary Table 3. Key pathways expressed during the *in-vivo* mDA differentiation process.** The mDA differentiation stages: key genes expressed at distinct stages of mDA neuron differentiation is based on work of Based on by Blaess & Ang<sup>45</sup>, Bjorklund & S. B. Dunnet<sup>6</sup>, Tiklova, Bjorklund et al.<sup>7</sup>, Hegarty<sup>8</sup>, and Arenas<sup>9</sup>. These mDA differentiation stage markers, which are specific and essential for mDA differentiation, were used to confirm that the correct mDA differentiation path was followed in vitro. **Expression modules:** iPSCs (undifferentiated stem cells), radial glia (Rgl), progenitors leading to various cell types of the midbrain (Prog), to neural progenitors (NProg) which lead to mDA neurons, mDA neurons (DA). These groups are based on a recent publication by Ásgrímsdóttir & Arenas<sup>10</sup> and allowed us to show the progression of the differentiation process.



| Gene                 | Max p-val. | Avg     | Gene                 | Max p-val. | Avg     | Gene                 | Max p-val. | Avg     |
|----------------------|------------|---------|----------------------|------------|---------|----------------------|------------|---------|
| <i>SNHG5</i>         | 2,84E-40   | 1,2233  | <i>DNAJC15</i>       | 2,13E-05   | -0,2908 | <i>YPEL1</i>         | 2,24E-03   | 0,1418  |
| <i>PGK1</i>          | 8,78E-31   | 0,5781  | <i>TTC3</i>          | 2,27E-05   | -0,2084 | <i>DPH3</i>          | 2,27E-03   | 0,1660  |
| <i>CALM2P2</i>       | 1,65E-22   | -0,4551 | <i>MYL9</i>          | 2,32E-05   | 0,1653  | <i>ZNF593</i>        | 2,38E-03   | 0,1409  |
| <i>MTRNR2L1</i>      | 3,71E-21   | -0,7731 | <i>IPO7</i>          | 3,20E-05   | 0,1495  | <i>SNHG8</i>         | 2,44E-03   | 0,2942  |
| <i>MYL6</i>          | 1,24E-19   | 0,3070  | <i>PTGR1</i>         | 3,38E-05   | -0,2377 | <i>RNF26</i>         | 2,65E-03   | 0,1134  |
| <i>S100A6</i>        | 2,09E-17   | -0,4393 | <i>C14ORF119</i>     | 3,53E-05   | 0,2194  | <i>SLC7A8</i>        | 2,66E-03   | -0,2006 |
| <i>ZNF280D</i>       | 2,49E-17   | -0,4377 | <i>RP11.288E14.2</i> | 4,65E-05   | -0,1661 | <i>THUMPD3</i>       | 2,66E-03   | 0,2241  |
| <i>TYW3</i>          | 1,73E-14   | 0,4748  | <i>NSA2</i>          | 4,67E-05   | -0,2075 | <i>NUP62</i>         | 2,75E-03   | 0,1122  |
| <i>TCEAL5</i>        | 6,78E-14   | -0,3745 | <i>SRA1</i>          | 5,11E-05   | 0,2118  | <i>RTCB</i>          | 2,78E-03   | 0,1859  |
| <i>MT.ND5</i>        | 3,70E-13   | -0,2243 | <i>ZNF75A</i>        | 6,89E-05   | -0,1561 | <i>EIF3A</i>         | 2,83E-03   | 0,1690  |
| <i>RP11.641D5.1</i>  | 4,00E-13   | -0,4508 | <i>GTF2I</i>         | 7,03E-05   | -0,2326 | <i>CD164</i>         | 2,83E-03   | 0,2346  |
| <i>HMGNI38</i>       | 3,95E-12   | -0,3460 | <i>FAM208A</i>       | 7,79E-05   | -0,1284 | <i>IPO9</i>          | 2,84E-03   | 0,1533  |
| <i>CRYZ</i>          | 1,36E-11   | 0,2732  | <i>RP11.676M6.1</i>  | 9,09E-05   | -0,1732 | <i>FAM126A</i>       | 2,86E-03   | 0,2571  |
| <i>MORF4L1P1</i>     | 1,39E-11   | -0,4552 | <i>HLA.B</i>         | 1,25E-04   | 0,1239  | <i>IQCB1</i>         | 2,93E-03   | 0,1169  |
| <i>TCF25</i>         | 5,14E-11   | -0,2072 | <i>SMARCB1</i>       | 1,47E-04   | -0,1477 | <i>HNRNPCP1</i>      | 2,93E-03   | -0,1692 |
| <i>CRKL</i>          | 1,44E-10   | 0,2138  | <i>SEPT2</i>         | 1,52E-04   | -0,1305 | <i>HSD17B4</i>       | 2,97E-03   | -0,1338 |
| <i>CYFIPI1</i>       | 1,47E-10   | 0,3021  | <i>HIC2</i>          | 1,57E-04   | 0,1798  | <i>CCNB1IP1</i>      | 3,00E-03   | 0,1361  |
| <i>PTMAP5</i>        | 2,02E-10   | -0,4196 | <i>EIF5P1</i>        | 1,70E-04   | -0,2675 | <i>SHROOM3</i>       | 3,03E-03   | 0,1114  |
| <i>RP11.692N5.2</i>  | 3,69E-10   | -0,5485 | <i>SNAP29</i>        | 2,12E-04   | 0,2991  | <i>RP13.258O15.1</i> | 3,39E-03   | -0,2489 |
| <i>HSPA8</i>         | 4,07E-10   | 0,4696  | <i>ACTN1</i>         | 2,14E-04   | 0,2552  | <i>PSMD7</i>         | 3,85E-03   | 0,1997  |
| <i>C6ORF48</i>       | 5,37E-10   | 0,3012  | <i>RRP7A</i>         | 2,19E-04   | 0,1897  | <i>TMEM38B</i>       | 3,98E-03   | -0,1816 |
| <i>RP11.475C16.1</i> | 8,30E-10   | -0,3438 | <i>EIF1AY</i>        | 3,64E-04   | 0,2735  | <i>SRSF9</i>         | 4,05E-03   | -0,1431 |
| <i>NLRP2</i>         | 1,91E-09   | -0,4704 | <i>RP11.488C13.1</i> | 3,83E-04   | -0,4249 | <i>MYO10</i>         | 4,23E-03   | 0,1666  |
| <i>CCDC144NL.AS1</i> | 2,27E-09   | 0,5870  | <i>AZI2</i>          | 4,11E-04   | -0,1967 | <i>AK6</i>           | 4,24E-03   | 0,1088  |
| <i>ZNF37A</i>        | 3,66E-09   | 0,2595  | <i>THAP9.AS1</i>     | 4,34E-04   | -0,1848 | <i>LANCL1</i>        | 4,28E-03   | 0,1186  |
| <i>MALAT1</i>        | 8,50E-09   | -0,2594 | <i>CTSB</i>          | 5,60E-04   | 0,1873  | <i>RRAGD</i>         | 4,30E-03   | 0,1525  |
| <i>HNRNPC</i>        | 1,95E-08   | -0,2880 | <i>HNRNPCP2</i>      | 5,82E-04   | -0,2255 | <i>PFKP</i>          | 4,80E-03   | 0,2555  |
| <i>CD59</i>          | 1,96E-08   | 0,2756  | <i>CNTNAP2</i>       | 6,80E-04   | 0,2072  | <i>NONO</i>          | 4,82E-03   | -0,1609 |
| <i>MINOSIP3</i>      | 2,08E-08   | -0,3666 | <i>SH3YL1</i>        | 7,01E-04   | -0,1055 | <i>STK33</i>         | 4,87E-03   | -0,1139 |
| <i>NIPA2</i>         | 2,62E-08   | 0,2650  | <i>IWS1</i>          | 7,26E-04   | 0,1393  | <i>PDAPI</i>         | 4,93E-03   | -0,1437 |
| <i>THAP7</i>         | 2,82E-08   | 0,1644  | <i>WBSCR22</i>       | 7,45E-04   | 0,1442  | <i>KMT2A</i>         | 5,37E-03   | 0,1419  |
| <i>TUBGCP5</i>       | 3,34E-08   | 0,2310  | <i>CSNK1G3</i>       | 7,96E-04   | 0,1590  | <i>CHCHD2</i>        | 5,40E-03   | -0,1740 |
| <i>ZNF880</i>        | 5,11E-08   | 0,2523  | <i>TRA2A</i>         | 8,89E-04   | -0,1567 | <i>EGLN3</i>         | 5,56E-03   | 0,2413  |
| <i>RP4.765C7.2</i>   | 5,86E-08   | -0,4253 | <i>ATG101</i>        | 9,22E-04   | 0,1437  | <i>RP4.796I17.5</i>  | 5,89E-03   | -0,2372 |
| <i>CBX3P9</i>        | 1,01E-07   | -0,3360 | <i>GOPC</i>          | 9,27E-04   | -0,2850 | <i>IFI27L1</i>       | 6,12E-03   | 0,1175  |
| <i>EFCAB2</i>        | 1,23E-07   | -0,2189 | <i>RAB4A</i>         | 9,50E-04   | -0,1061 | <i>TCTN3</i>         | 6,14E-03   | 0,1193  |
| <i>ADGRG7</i>        | 2,23E-07   | -0,2592 | <i>PSMB5</i>         | 1,02E-03   | 0,2740  | <i>TCEAL7</i>        | 6,36E-03   | 0,1544  |
| <i>COMT</i>          | 2,24E-07   | 0,2857  | <i>PCBP1</i>         | 1,10E-03   | 0,2692  | <i>SLC25A4</i>       | 6,39E-03   | 0,3074  |
| <i>AC009245.3</i>    | 2,69E-07   | -0,3344 | <i>RP11.64B16.2</i>  | 1,15E-03   | -0,1741 | <i>CMTM8</i>         | 6,62E-03   | -0,1925 |
| <i>PGD</i>           | 6,71E-07   | 0,2393  | <i>BTN2A2</i>        | 1,35E-03   | 0,1140  | <i>FZD7</i>          | 7,11E-03   | 0,1098  |
| <i>PALLD</i>         | 1,89E-06   | 0,2538  | <i>RFWD3</i>         | 1,37E-03   | 0,1330  | <i>ZNF83</i>         | 7,35E-03   | -0,1129 |
| <i>GPC3</i>          | 2,07E-06   | 0,3866  | <i>NDUFB11</i>       | 1,46E-03   | -0,2012 | <i>LINC00909</i>     | 7,53E-03   | -0,1021 |
| <i>SMARCA4</i>       | 2,97E-06   | 0,2588  | <i>EIF3B</i>         | 1,52E-03   | 0,1427  | <i>C21ORF91</i>      | 7,57E-03   | 0,1393  |
| <i>NME4</i>          | 4,13E-06   | -0,2830 | <i>CBX1</i>          | 1,56E-03   | -0,2092 | <i>CEP350</i>        | 7,93E-03   | 0,1442  |
| <i>PKP2</i>          | 4,26E-06   | 0,1924  | <i>AK4</i>           | 1,80E-03   | 0,1560  | <i>SLK</i>           | 8,24E-03   | 0,1787  |
| <i>MLF1</i>          | 4,69E-06   | -0,3043 | <i>MRPL15</i>        | 1,83E-03   | 0,1734  | <i>CSTB</i>          | 8,38E-03   | 0,2675  |
| <i>C19ORF53</i>      | 5,42E-06   | 0,3207  | <i>EEF1A1</i>        | 1,88E-03   | -0,2174 | <i>SC5D</i>          | 8,78E-03   | 0,1420  |
| <i>MED15</i>         | 1,26E-05   | 0,2428  | <i>PSMG3</i>         | 1,90E-03   | -0,1677 | <i>CAT</i>           | 9,46E-03   | -0,1288 |
| <i>OSBPL8</i>        | 1,56E-05   | 0,2914  | <i>WDR34</i>         | 2,01E-03   | 0,1276  | <i>NAA20</i>         | 9,72E-03   | 0,1481  |
| <i>SMARCE1P6</i>     | 1,86E-05   | -0,1960 | <i>RBM12</i>         | 2,10E-03   | 0,1040  | <i>MRPL17</i>        | 9,86E-03   | 0,1464  |
|                      |            |         |                      |            |         | <i>WDR11</i>         | 9,94E-03   | 0,1321  |

**Supplementary Table 4. Group B, 151 genes.** Using the maximum adjusted p-value in a pairwise combinations as adjusted p-value, and the average fold change that occurred in the pairwise comparison as fold change threshold, identified genes only dysregulated in the same direction at all timepoints. This analysis led to 151 DEGs, which include previously identified genes of Group A, and of which 65 were upregulated and 86 downregulated compared with controls ( $p_{adj} < 0.01$  and  $FC > 0.1$ ).

| Gene                 | Max p-val. | Avg       | Gene             | Max p-val. | Avg       | Gene                 | Max p-val. | Avg      |
|----------------------|------------|-----------|------------------|------------|-----------|----------------------|------------|----------|
| <i>MTRNR2L1</i>      | 3,71E-21   | -7,73E-01 | <i>SMARCB1</i>   | 1,47E-04   | -1,48E-01 | <i>TCEAL7</i>        | 6,36E-03   | 1,54E-01 |
| <i>RP11.692N5.2</i>  | 3,69E-10   | -5,49E-01 | <i>PDAP1</i>     | 4,93E-03   | -1,44E-01 | <i>AK4</i>           | 1,80E-03   | 1,56E-01 |
| <i>NLRP2</i>         | 1,91E-09   | -4,70E-01 | <i>SRSF9</i>     | 4,05E-03   | -1,43E-01 | <i>CSNK1G3</i>       | 7,96E-04   | 1,59E-01 |
| <i>MORF4LIP1</i>     | 1,39E-11   | -4,55E-01 | <i>HSD17B4</i>   | 2,97E-03   | -1,34E-01 | <i>THAP7</i>         | 2,82E-08   | 1,64E-01 |
| <i>CALM2P2</i>       | 1,65E-22   | -4,55E-01 | <i>SEPT2</i>     | 1,52E-04   | -1,30E-01 | <i>MYL9</i>          | 2,32E-05   | 1,65E-01 |
| <i>RP11.641D5.1</i>  | 4,00E-13   | -4,51E-01 | <i>CAT</i>       | 9,46E-03   | -1,29E-01 | <i>DPH3</i>          | 2,27E-03   | 1,66E-01 |
| <i>S100A6</i>        | 2,09E-17   | -4,39E-01 | <i>FAM208A</i>   | 7,79E-05   | -1,28E-01 | <i>MYO10</i>         | 4,23E-03   | 1,67E-01 |
| <i>ZNF280D</i>       | 2,49E-17   | -4,38E-01 | <i>STK33</i>     | 4,87E-03   | -1,14E-01 | <i>EIF3A</i>         | 2,83E-03   | 1,69E-01 |
| <i>RP4.765C7.2</i>   | 5,86E-08   | -4,25E-01 | <i>ZNF83</i>     | 7,35E-03   | -1,13E-01 | <i>MRPL15</i>        | 1,83E-03   | 1,73E-01 |
| <i>RP11.488C13.1</i> | 3,83E-04   | -4,25E-01 | <i>GOLGA8B</i>   | 3,36E-03   | -1,11E-01 | <i>SLK</i>           | 8,24E-03   | 1,79E-01 |
| <i>PTMAP5</i>        | 2,02E-10   | -4,20E-01 | <i>MGMT</i>      | 8,83E-03   | -1,11E-01 | <i>HIC2</i>          | 1,57E-04   | 1,80E-01 |
| <i>TCEAL5</i>        | 6,78E-14   | -3,75E-01 | <i>RNPC3</i>     | 5,86E-03   | -1,08E-01 | <i>RTCB</i>          | 2,78E-03   | 1,86E-01 |
| <i>MINOS1P3</i>      | 2,08E-08   | -3,67E-01 | <i>RAB4A</i>     | 9,50E-04   | -1,06E-01 | <i>CTSB</i>          | 5,60E-04   | 1,87E-01 |
| <i>PLCB4</i>         | 6,73E-03   | -3,61E-01 | <i>SH3YL1</i>    | 7,01E-04   | -1,06E-01 | <i>RRP7A</i>         | 2,19E-04   | 1,90E-01 |
| <i>HMGNI38</i>       | 3,95E-12   | -3,46E-01 | <i>FBXO9</i>     | 1,03E-03   | -1,03E-01 | <i>PKP2</i>          | 4,26E-06   | 1,92E-01 |
| <i>RP11.475C16.1</i> | 8,30E-10   | -3,44E-01 | <i>LINC00909</i> | 7,53E-03   | -1,02E-01 | <i>PSMD7</i>         | 3,85E-03   | 2,00E-01 |
| <i>CBX3P9</i>        | 1,01E-07   | -3,36E-01 | <i>RBM12</i>     | 2,10E-03   | 1,04E-01  | <i>CNTNAP2</i>       | 6,80E-04   | 2,07E-01 |
| <i>AC009245.3</i>    | 2,69E-07   | -3,34E-01 | <i>SPRED1</i>    | 8,51E-05   | 1,05E-01  | <i>SRA1</i>          | 5,11E-05   | 2,12E-01 |
| <i>MLF1</i>          | 4,69E-06   | -3,04E-01 | <i>ABRACL</i>    | 3,57E-03   | 1,05E-01  | <i>CRKL</i>          | 1,44E-10   | 2,14E-01 |
| <i>DNAJC15</i>       | 2,13E-05   | -2,91E-01 | <i>CNN3</i>      | 2,49E-04   | 1,07E-01  | <i>C14ORF119</i>     | 3,53E-05   | 2,19E-01 |
| <i>HNRNPC</i>        | 1,95E-08   | -2,88E-01 | <i>AK6</i>       | 4,24E-03   | 1,09E-01  | <i>THUMPD3</i>       | 2,66E-03   | 2,24E-01 |
| <i>GOPC</i>          | 9,27E-04   | -2,85E-01 | <i>FZD7</i>      | 7,11E-03   | 1,10E-01  | <i>TAGLN</i>         | 3,67E-03   | 2,31E-01 |
| <i>NME4</i>          | 4,13E-06   | -2,83E-01 | <i>CUL3</i>      | 1,58E-06   | 1,10E-01  | <i>TUBGCP5</i>       | 3,34E-08   | 2,31E-01 |
| <i>EIF5P1</i>        | 1,70E-04   | -2,68E-01 | <i>SHROOM3</i>   | 3,03E-03   | 1,11E-01  | <i>CD164</i>         | 2,28E-03   | 2,35E-01 |
| <i>RALGPS2</i>       | 5,42E-04   | -2,64E-01 | <i>NUP62</i>     | 2,75E-03   | 1,12E-01  | <i>PGD</i>           | 6,71E-07   | 2,39E-01 |
| <i>MALAT1</i>        | 8,50E-09   | -2,59E-01 | <i>RNF26</i>     | 2,65E-03   | 1,13E-01  | <i>EGLN3</i>         | 5,56E-03   | 2,41E-01 |
| <i>ADGRG7</i>        | 2,23E-07   | -2,59E-01 | <i>BTN2A2</i>    | 1,35E-03   | 1,14E-01  | <i>MED15</i>         | 1,26E-05   | 2,43E-01 |
| <i>RP13.258O15.1</i> | 3,39E-03   | -2,49E-01 | <i>IQCBI</i>     | 2,93E-03   | 1,17E-01  | <i>ZNF880</i>        | 5,11E-08   | 2,52E-01 |
| <i>PTGRI</i>         | 3,38E-05   | -2,38E-01 | <i>IFI27L1</i>   | 6,12E-03   | 1,17E-01  | <i>PALLD</i>         | 1,89E-06   | 2,54E-01 |
| <i>RP4.796I17.5</i>  | 5,89E-03   | -2,37E-01 | <i>LANCL1</i>    | 4,28E-03   | 1,19E-01  | <i>ACTN1</i>         | 2,14E-04   | 2,55E-01 |
| <i>GTF2I</i>         | 7,03E-05   | -2,33E-01 | <i>PTPRZ1</i>    | 2,10E-03   | 1,19E-01  | <i>PFKP</i>          | 4,80E-03   | 2,56E-01 |
| <i>FOS</i>           | 2,71E-03   | -2,31E-01 | <i>TCTN3</i>     | 6,14E-03   | 1,19E-01  | <i>FAM126A</i>       | 2,86E-03   | 2,57E-01 |
| <i>HNRNPCP2</i>      | 5,82E-04   | -2,26E-01 | <i>EXOC5</i>     | 3,74E-05   | 1,21E-01  | <i>SMARCA4</i>       | 2,97E-06   | 2,59E-01 |
| <i>MT-ND5</i>        | 3,70E-13   | -2,24E-01 | <i>HLA.B</i>     | 1,25E-04   | 1,24E-01  | <i>ZNF37A</i>        | 3,66E-09   | 2,59E-01 |
| <i>EFCAB2</i>        | 1,23E-07   | -2,19E-01 | <i>WDR34</i>     | 2,01E-03   | 1,28E-01  | <i>NIPA2</i>         | 2,62E-08   | 2,65E-01 |
| <i>EEF1A1</i>        | 1,88E-03   | -2,17E-01 | <i>CYCS</i>      | 5,25E-04   | 1,31E-01  | <i>CSTB</i>          | 8,38E-03   | 2,68E-01 |
| <i>PHYH</i>          | 6,13E-05   | -2,17E-01 | <i>WDR11</i>     | 9,94E-03   | 1,32E-01  | <i>PCBP1</i>         | 1,10E-03   | 2,69E-01 |
| <i>CBX1</i>          | 1,56E-03   | -2,09E-01 | <i>RFWD3</i>     | 1,37E-03   | 1,33E-01  | <i>CRYZ</i>          | 1,36E-11   | 2,73E-01 |
| <i>NTC3</i>          | 2,27E-05   | -2,08E-01 | <i>CCNB1IP1</i>  | 3,00E-03   | 1,36E-01  | <i>EIF1AY</i>        | 3,64E-04   | 2,73E-01 |
| <i>NSA2</i>          | 4,67E-05   | -2,08E-01 | <i>IWS1</i>      | 7,26E-04   | 1,39E-01  | <i>PSMB5</i>         | 1,02E-03   | 2,74E-01 |
| <i>TCF25</i>         | 5,14E-11   | -2,07E-01 | <i>C21ORF91</i>  | 7,57E-03   | 1,39E-01  | <i>CD59</i>          | 1,96E-08   | 2,76E-01 |
| <i>NDUFB11</i>       | 1,46E-03   | -2,01E-01 | <i>ZNF593</i>    | 2,38E-03   | 1,41E-01  | <i>COMT</i>          | 2,24E-07   | 2,86E-01 |
| <i>SLC7A8</i>        | 2,66E-03   | -2,01E-01 | <i>GNB1</i>      | 3,01E-03   | 1,41E-01  | <i>OSBPL8</i>        | 1,56E-05   | 2,91E-01 |
| <i>RSRP1</i>         | 2,91E-06   | -1,98E-01 | <i>YPEL1</i>     | 2,24E-03   | 1,42E-01  | <i>SNHG8</i>         | 2,44E-03   | 2,94E-01 |
| <i>AZ12</i>          | 4,11E-04   | -1,97E-01 | <i>KMT2A</i>     | 5,37E-03   | 1,42E-01  | <i>SNAP29</i>        | 2,12E-04   | 2,99E-01 |
| <i>SMARCE1P6</i>     | 1,86E-05   | -1,96E-01 | <i>SC5D</i>      | 8,78E-03   | 1,42E-01  | <i>C6ORF48</i>       | 5,37E-10   | 3,01E-01 |
| <i>CMTM8</i>         | 6,62E-03   | -1,93E-01 | <i>EIF3B</i>     | 1,52E-03   | 1,43E-01  | <i>CYFIP1</i>        | 1,47E-10   | 3,02E-01 |
| <i>THAP9.AS1</i>     | 4,34E-04   | -1,85E-01 | <i>FRA10AC1</i>  | 2,39E-04   | 1,43E-01  | <i>MYL6</i>          | 1,24E-19   | 3,07E-01 |
| <i>TMEM38B</i>       | 3,98E-03   | -1,82E-01 | <i>IPOS</i>      | 6,49E-03   | 1,43E-01  | <i>SLC25A4</i>       | 6,39E-03   | 3,07E-01 |
| <i>RP11.64B16.2</i>  | 1,15E-03   | -1,74E-01 | <i>ATG101</i>    | 9,22E-04   | 1,44E-01  | <i>C19ORF53</i>      | 5,42E-06   | 3,21E-01 |
| <i>CHCHD2</i>        | 5,40E-03   | -1,74E-01 | <i>CEP350</i>    | 7,93E-03   | 1,44E-01  | <i>GPC3</i>          | 2,07E-06   | 3,87E-01 |
| <i>RP11.676M6.1</i>  | 9,09E-05   | -1,73E-01 | <i>WBSCR22</i>   | 7,45E-04   | 1,44E-01  | <i>HSPA8</i>         | 4,07E-10   | 4,70E-01 |
| <i>HNRNPCP1</i>      | 2,93E-03   | -1,69E-01 | <i>MRPL17</i>    | 9,86E-03   | 1,46E-01  | <i>TYW3</i>          | 1,73E-14   | 4,75E-01 |
| <i>PSMG3</i>         | 1,90E-03   | -1,68E-01 | <i>NAA20</i>     | 9,72E-03   | 1,48E-01  | <i>PGK1</i>          | 8,78E-31   | 5,78E-01 |
| <i>RP11.288E14.2</i> | 4,65E-05   | -1,66E-01 | <i>IPO7</i>      | 3,20E-05   | 1,50E-01  | <i>CCDC144NL.AS1</i> | 2,27E-09   | 5,87E-01 |
| <i>NONO</i>          | 4,82E-03   | -1,61E-01 | <i>CENPW</i>     | 2,16E-03   | 1,50E-01  | <i>SNHG5</i>         | 2,84E-40   | 1,22E+00 |
| <i>TRA2A</i>         | 8,89E-04   | -1,57E-01 | <i>RRAGD</i>     | 4,30E-03   | 1,52E-01  |                      |            |          |
| <i>ZNF75A</i>        | 6,89E-05   | -1,56E-01 | <i>IPO9</i>      | 2,84E-03   | 1,53E-01  |                      |            |          |

**Supplementary Table 5. Group C, 172 genes.** Repeating the same analysis for the four timepoints (iPSCs, D6, D15 and D21) as in Group B, but taking into account only the absolute degree of change in iPSCs, yielded 172 genes. The analysis is based on gene expression matrix of 4495 cells (39,194 genes). For Group D (292 genes) see Supplementary Data 1.

|         |                             |
|---------|-----------------------------|
| PARK1&4 | <i>SNCA</i>                 |
| PARK2   | <i>PARKIN</i>               |
| PARK3   | unknown / not found         |
| PARK5   | <i>UCHL1</i>                |
| PARK6   | <i>PINK1</i>                |
| PARK7   | <i>DJ-1</i>                 |
| PARK8   | <i>LRRK2</i>                |
| PARK9   | <i>ATP13A2</i>              |
| PARK10  | <i>USP24</i>                |
| PARK11  | <i>GRB10</i>                |
| PARK12  | unknown / risk factor locus |
| PARK13  | <i>HTRA2</i>                |
| PARK14  | <i>PLA2G6</i>               |
| PARK15  | <i>FBXO7</i>                |
| PARK16  | unknown / risk factor locus |
| PARK17  | <i>VPS35</i>                |
| PARK18  | <i>EIF4G1</i>               |
| PARK19  | <i>DNAJC6</i>               |
| PARK20  | <i>SYNJ1</i>                |
| PARK21  | <i>DNAJC13</i>              |
| PARK22  | <b><i>CHCHD2</i></b>        |
| PARK23  | <i>VPS13C</i>               |

**Supplementary Table 6. Parkinson's disease-associated (PARK) genes<sup>11-17</sup>.** Variants in several genes or loci have been shown to either cause or be associated with increased susceptibility to PD, these have been designated the PARK loci/genes. **CHCHD2** is highlighted in bold, as it is also a DEG gene identified by our SC-RNAseq analysis.

| <b>PCR primers</b>                          |                                  |                   |                                  |                 |                    |
|---------------------------------------------|----------------------------------|-------------------|----------------------------------|-----------------|--------------------|
| <b>Gene</b>                                 | <b>qRT-PCR primer forward</b>    |                   | <b>qRT-PCR primer reverse</b>    |                 |                    |
| OTX2                                        | GAGGTGGCACTGAAAATCAAC            |                   | TCTTCTTTTTGGCAGGTCTCA            |                 |                    |
| EN1                                         | CGTGGTCAAACTGACTCGC              |                   | CGCTTGTCTCCTTCTCGTT              |                 |                    |
| LMX1A                                       | GCTCAGAGCAGTTCAGAGGG             |                   | CAAGCAGGAGTTTGCCCAAC             |                 |                    |
| FOXA2                                       | ATTTTAACTGCCATGCACTCG            |                   | ATGTTGCTCACGGAGGAGTAG            |                 |                    |
| TH                                          | GGAAATTGAGAAGCTGTCCACG           |                   | GAATCTCAGGCTCCTCAGACAG           |                 |                    |
| ALDH1A1                                     | GAGAGTGGGAAGAAAGAAGGGG           |                   | TTCATGATTTGCTGCACTGGTC           |                 |                    |
| GIRK2/KCNJ6                                 | AGCTGCCCAAAGAGGAACTG             |                   | ACAGGTGTGAACCGGTAACC             |                 |                    |
| GAPDH                                       | AAGAAGGTGGTGAAGCAGGC             |                   | GTCAAAGGTGGAGGAGTGGG             |                 |                    |
|                                             | <b>Sequencing primer forward</b> |                   | <b>Sequencing primer reverse</b> |                 |                    |
| PINK1                                       | GAGGTCCCAAGCAACTAGCC             |                   | TGGCCGTAGAAGGGATTGAC             |                 |                    |
| <b>Antibodies</b>                           |                                  |                   |                                  |                 |                    |
| <b>Target</b>                               | <b>Host</b>                      | <b>reactivity</b> | <b>Manufacturer</b>              | <b>Dilution</b> | <b>Catalogue #</b> |
| <b>1oAb</b>                                 |                                  |                   |                                  |                 |                    |
| POU5F1 (Oct3/4)                             | mouse                            | human             | Santa Cruz Biotechnology         | 1:500           | sc-5279            |
| Tra-1-60                                    | mouse                            | human             | Merck Millipore                  | 1:500           | MAB4360            |
| PITX3                                       | rabbit                           | human             | sigmaaldrich                     | 1:100           | HPA044639          |
| LMX1A                                       | rabbit                           | human             | abcam                            | 1:500           | ab139726           |
| Slc6A3/DAT                                  | rabbit                           | human             | Thermofisher                     | 1:1000          | PA1-4656           |
| MAP2                                        | mouse                            | human & other     | Sigma / Merck                    | 1:500           | MAB3418            |
| TH                                          | rabbit                           | human             | Pel-Freez Biologicals            | 1:500           | P40101             |
| TH                                          | mouse                            | human             | Merck Millipore                  | 1:500           | MAB 318            |
| <b>2oAb</b>                                 |                                  |                   |                                  |                 |                    |
| Donkey anti-Rabbit IgG, Alexa Fluor 488     |                                  |                   | Thermofisher                     | 1:1000          | A32790             |
| Donkey anti-Mouse IgG, Alexa Fluor Plus 555 |                                  |                   | Thermofisher                     | 1:1000          | A32773             |

**Supplementary Table 7. List of primers used for qPCR expression analysis, sequencing and antibodies used for immunocytochemistry.**

| DAY 25       | DAY 40     |
|--------------|------------|
| ABCA8        | ALCAM      |
| ATRIP        | ANXA1      |
| CACNA2D1     | CD99       |
| CRABP1       | CPE        |
| <u>CSRP2</u> | <b>DDC</b> |
| <b>DDC</b>   | FAM127A    |
| DPP7         | MAOB       |
| FABP7        | <b>NES</b> |
| FARP1        | PON2       |
| FLNC         | SEPT6      |
| FUCA1        | <b>TH</b>  |
| KIF21A       | <b>VIM</b> |
| MAP6         |            |
| MCAM         |            |
| MCM2         |            |
| MCM6         |            |
| MUT          |            |
| NEBL         |            |
| NENF         |            |
| <b>NES</b>   |            |
| PSAT1        |            |
| RTL1         |            |
| STXBP1       |            |
| <b>TH</b>    |            |
| TPBG         |            |
| TPPP3        |            |
| TSPAN6       |            |
| VAT1L        |            |
| <b>VIM</b>   |            |
| <u>VWA5A</u> |            |
| WLS          |            |

**Supplementary Table 8. Proteomics analysis.** Proteins differentially abundant in a PINK cell line, compared to a control, in two biological duplicates per each timepoint (D25 and D40). Proteins found differentially abundant at both timepoints are highlighted in bold. Proteins also identified as by SC-RNAseq as differentially expressed at the mRNA level are underlined.

| Amp/Deletion Table       |         |             |             |          |                |          |            |                                                                                                                                                     | Overlap Normal CNVs? + |
|--------------------------|---------|-------------|-------------|----------|----------------|----------|------------|-----------------------------------------------------------------------------------------------------------------------------------------------------|------------------------|
| Chr                      | Amp/Del | Start(bp)   | Stop(bp)    | Size(kb) | Chr Band       | # Probes | Log2 Ratio | Genes *                                                                                                                                             |                        |
| 2                        | AMP     | 188,058,313 | 189,724,370 | 1,666    | q32.1 - q32.2  | 50       | 0.292488   | CALCRL, TFPI, LINC01090, GULP1, No MIR561, DIRC1                                                                                                    | No                     |
| 3                        | AMP     | 146,708,800 | 147,362,016 | 653      | q24            | 81       | 0.299431   | ZIC4, ZIC1, LOC440982                                                                                                                               | No                     |
| 4                        | AMP     | 61,619,455  | 63,761,135  | 2,142    | q13.1          | 66       | 0.255822   | MIR548AG1, ADGRL3, ADGRL3-AS1                                                                                                                       | No                     |
| 4                        | AMP     | 92,202,997  | 94,796,142  | 2,593    | q22.1 - q22.2  | 87       | 0.293805   | CCSER1, LOC101929194, GRID2, ATOH1                                                                                                                  | No                     |
| 5                        | AMP     | 146,716,607 | 147,447,900 | 731      | q32            | 44       | 0.313221   | STK32A, DPYSL3, JAKMIP2-AS1, JAKMIP2, SPINK1, SCGB3A2, C5orf46, SPINK5                                                                              | No                     |
| 7                        | AMP     | 100,980,697 | 101,126,393 | 146      | q22.1          | 6        | 0.609012   | COL26A1                                                                                                                                             | Yes                    |
| 7                        | DEL     | 110,564,801 | 110,708,070 | 143      | q31.1          | 6        | -0.9213    | IMMP2L                                                                                                                                              | Yes                    |
| 7                        | AMP     | 121,256,234 | 122,628,757 | 1,373    | q31.32         | 142      | 0.328262   | PTPRZ1, AASS, FEZF1, FEZF1-AS1, CADPS2, RNF133, RNF148                                                                                              | No                     |
| 9                        | DEL     | 43,590,480  | 43,841,603  | 251      | p12 - p11.2    | 6        | -0.74614   | FAM74A7, SPATA31A6, CNTNAP3B, CNTNAP3P2                                                                                                             | Yes                    |
| 11                       | AMP     | 91,344,721  | 92,716,856  | 1,372    | q14.3          | 45       | 0.302978   | FAT3, LOC105369431, MTNR1B                                                                                                                          | No                     |
| 12                       | DEL     | 92,022,671  | 93,355,847  | 1,333    | q21.33 - q22   | 44       | -0.25259   | LINC01619, BTG1, LOC101928617, CLLU1OS, CLLU1, C12orf74, PLEKHG7, EEA1                                                                              | No                     |
| 14                       | AMP     | 20,203,610  | 20,421,677  | 218      | q11.2          | 8        | 0.511181   | OR4Q3, OR4M1, OR4N2, OR4K2, OR4K5, OR4K1                                                                                                            | Yes                    |
| 16                       | AMP     | 34,452,586  | 34,743,643  | 291      | p11.2 - p11.1  | 12       | 0.371214   | LINC01566, FRG2DP, TP53TG3HP                                                                                                                        | Yes                    |
| 22                       | AMP     | 25,672,585  | 25,903,543  | 231      | q11.23 - q12.1 | 9        | 0.568746   | IGLL3P, LRP5L, CRYBB2P1, MIR6817                                                                                                                    | Yes                    |
| X                        | AMP     | 112,594,478 | 115,303,379 | 2,709    | q23            | 100      | 0.280264   | XACT, HTR2C, MIR448, IL13RA2, LUZP4, PLS3, AGTR2, LOC101928437, SNORA35, MIR764, MIR1912, MIR1264, MIR1298, MIR1911, LRCH2, RBMXL3, PLS3-AS1, DANT2 | No                     |
| <b>Total Amp/Del: 15</b> |         |             |             |          |                |          |            |                                                                                                                                                     |                        |

**Supplementary Table 9. Amplifications and Deletions.** Data was obtained from a CLG Microarray test performed at passage 9 (P9) (Supplementary Fig. 2). \* Genes amplified or deleted are cross referenced against the Online Mendelian Inheritance in Man (OMIM®) database.

| LOH Intervals Table           |             |             |          |                 |          |           |                                                                                                                                                                                                                                                                                           |
|-------------------------------|-------------|-------------|----------|-----------------|----------|-----------|-------------------------------------------------------------------------------------------------------------------------------------------------------------------------------------------------------------------------------------------------------------------------------------------|
| Chr                           | Start(bp)   | Stop(bp)    | Size(kb) | Chr Band        | # Probes | LOH Score | Genes *                                                                                                                                                                                                                                                                                   |
| 1                             | 1,089,699   | 39,243,405  | 38,154   | p36.33 - p34.3  | 402      | 36.74485  | Too Numerous to List                                                                                                                                                                                                                                                                      |
| 3                             | 123,562,478 | 127,688,648 | 4,126    | q21.1 - q21.3   | 54       | 6.073903  | Too Numerous to List                                                                                                                                                                                                                                                                      |
| 6                             | 1,696,841   | 18,775,310  | 17,078   | p25.3 - p22.3   | 385      | 28.04076  | Too Numerous to List                                                                                                                                                                                                                                                                      |
| 7                             | 79,723,943  | 89,361,740  | 9,638    | q21.11 - q21.13 | 189      | 15.34061  | GNAI1, GNAT3, CD36, SEMA3C, HGF, PCLO, SEMA3 E, SEMA3A, SEMA3D, GRM3, KIAA1324L, DMTF1, T P53TG1, CROT, ABCB4, ABCB1, SLC25A40, ADAM22, SRI, STEAP4, LOC101927269, LOC100128317, CACNA2D1, LOC101927356, LOC101927378, LINC00972, TMEM243, RUNDC3B, DBF4, LOC102723885, ZNF 804B, C7orf62 |
| 16                            | 55,121,927  | 84,673,276  | 29,551   | q12.2 - q24.1   | 575      | 55.62815  | Too Numerous to List                                                                                                                                                                                                                                                                      |
| 18                            | 62,974,135  | 65,905,964  | 2,932    | q22.1           | 77       | 6.992831  | CDH7, CDH19, DSEL, MIR5011, LOC643542                                                                                                                                                                                                                                                     |
| 20                            | 39,476,952  | 42,671,183  | 3,194    | q12 - q13.12    | 62       | 6.616215  | TOP1, PLCG1, ZHX3, LPIN3, CHD6, PTPRT, SRSF6, L3MBTL1, SGK2, MYBL2, TOX2, LOC100128988, PLCG1-AS1, MIR6871, EMILIN3, LOC101927159, IFT52, GTSF1L, LOC105372626                                                                                                                            |
| 22                            | 44,261,581  | 48,849,346  | 4,588    | q13.31 - q13.32 | 76       | 6.992831  | Too Numerous to List                                                                                                                                                                                                                                                                      |
| <b>Total LOH Intervals: 8</b> |             |             |          |                 |          |           |                                                                                                                                                                                                                                                                                           |

**Supplementary Table 10. LOH Intervals Table.** Data was obtained from a CLG Microarray test performed at passage 9 (P9) (Supplementary Fig. 2). \* Genes amplified or deleted are cross referenced against the Online Mendelian Inheritance in Man (OMIM®) database.

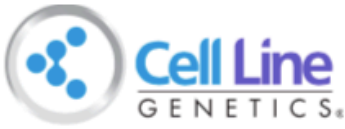

## Cell Line Characterization

**Cell Line ID:** ND 4066A  
**Passage #:** 2  
**Specimen Type:** Human Fibroblast Culture  
**Indication for Study:** Routine Culture QC

**Lab #:** CLG-20102  
**PI:** Dr. Steven Finkbeiner  
**Contact Person:** Gabriela Novak  
**Email:** gabriela.novak@gladstone.ucsf.edu

**Test Code:** 100  
**Account #:** NA  
**PO #:** 135048

**Date Received:** 5/29/2015  
**Date Reported:** 6/11/2015  
**Time in Culture:** 1 Day

**Address:**  
Gladstone Institutes  
1650 Owens Street  
San Francisco, California 94158

**Additional copies sent to:**

**Banding Technique:** GTL      **Band Resolution:** Fair  
**Metaphases Counted:** 20    **Analyzed:** 7    **Karyotyped:** 2

**RESULTS:** 46,XY[20]      Apparently NORMAL Human Male Karyotype

**Non-clonal Aberrations:** None

### INTERPRETATION:

Cytogenetic analysis was performed on twenty G-banded metaphase cells from human cell line ND 4066A p2 and all twenty cells demonstrated an apparently normal male karyotype.

Supplementary Figure 1. Fibroblast ND40066 cytogenetic analysis.



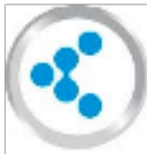

## CLG Microarray Test Results

**Cell Line ID:** ND 40066 clone8 p9    **Lab #:** CLG-24270    **Date received:** 6/17/16    **Date Reported:** 7/11/16

**Contact Person:** Gabriela Novak/Gaia Skibinski    **PI:** Finkbeiner    **Institute:** Gladstone

**Test Code:** aCGH 110    **Email:** gabriela.novak@gladstone.ucsf.edu/gaiaskibinski@gmail.com    **PO #:** 135048

**Mailing Address:** 1650 Owens Street, San Francisco, CA 94158

---

**Sample Type:** Human iPSC Frozen Cells    **dsDNA Concentration:** 454.0 ng/ $\mu$ l    **Total dsDNA:** 5.9 ug

**Sex:** Male    **260/280** (1.7-1.9): 1.8    **260/230** ( $\geq$ 1.90): 2.2    **Array Type:** Agilent 180K Standard aCGH

**Array ID Number:** 252983034296\_1\_2    **Reference DNA:** Agilent Euro Male

---

### Quality Control

A sufficient amount of high quality genomic DNA, as determined by UV spec. (NanoVue), fluorometer (Qubit) and Agarose Gel analysis, was extracted from cell line ND 40066 clone 8 p9 and passed our internal quality standards for aCGH labeling.

aCGH Probes (PASS/FAIL): Pass

SNP Probes (PASS/FAIL): Pass

Experimental Deviations: None

### Results:

Clonal Fraction: 100%

See attached sheets for Tabular and Graphical presentation of microarray results.

Variants are considered provisional until confirmed by another technique. For further confirmation of a particular variant, CLG recommends using Karyotyping (variants >5Mb), FISH (variants >200Kb).

**Supplementary Figure 2. iPSC ND40066 clone 8 aCGH analysis performed at P9.**

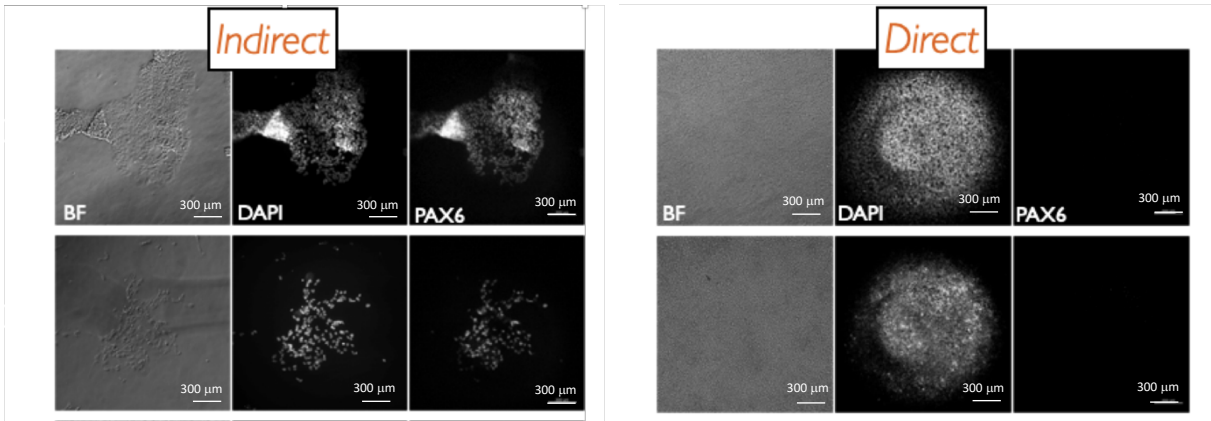

**Supplementary Figure 3. Staining for the non-midbrain DA marker PAX6.** “indirect” indicates indirect differentiation of DA neurons using rosettes in a two-stage process<sup>9</sup>, while “direct” indicates mDA differentiation using our protocol which differentiates iPSC into mDA neurons using one continuous process<sup>9,18</sup>.

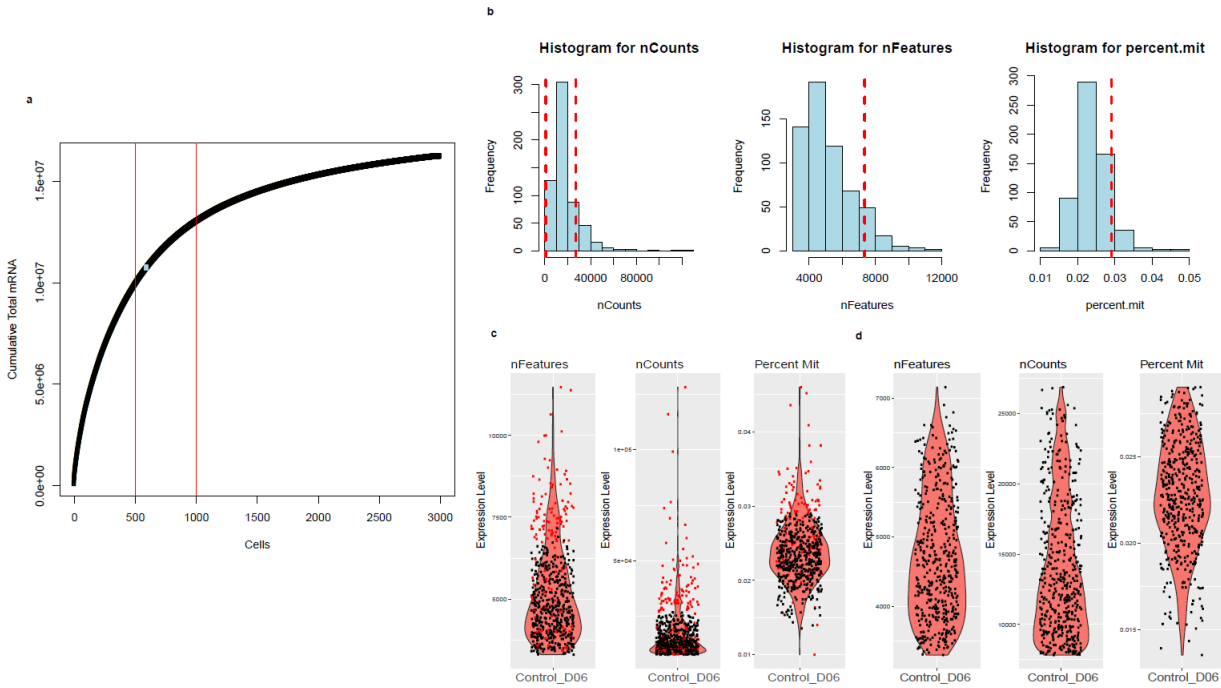

**Supplementary Figure 4. Quality control Plots of control sample on Day 06.** **a)** Cumulative Total number of counts. The red vertical lines represent the down and upper bound of the expected elbow. The blue dot represents the transitional point calculated using `ecpr` package. **b)** Histograms of the three criteria that were used for low quality cell filtering. **c,d)** Violin plots showing the distribution of the three criteria (nFeature= number of features/genes. nCount= number of counts, Percent.Mit = mitochondrial counts percentage). Each dot represent a cell in the dataset. **c)** The distribution of the three metrics before filtering. Red dots are cells that filtered after the quality control and black dots are cells which were kept for downstream analysis. **d)** The distributions of the QC metrics after filtering step.

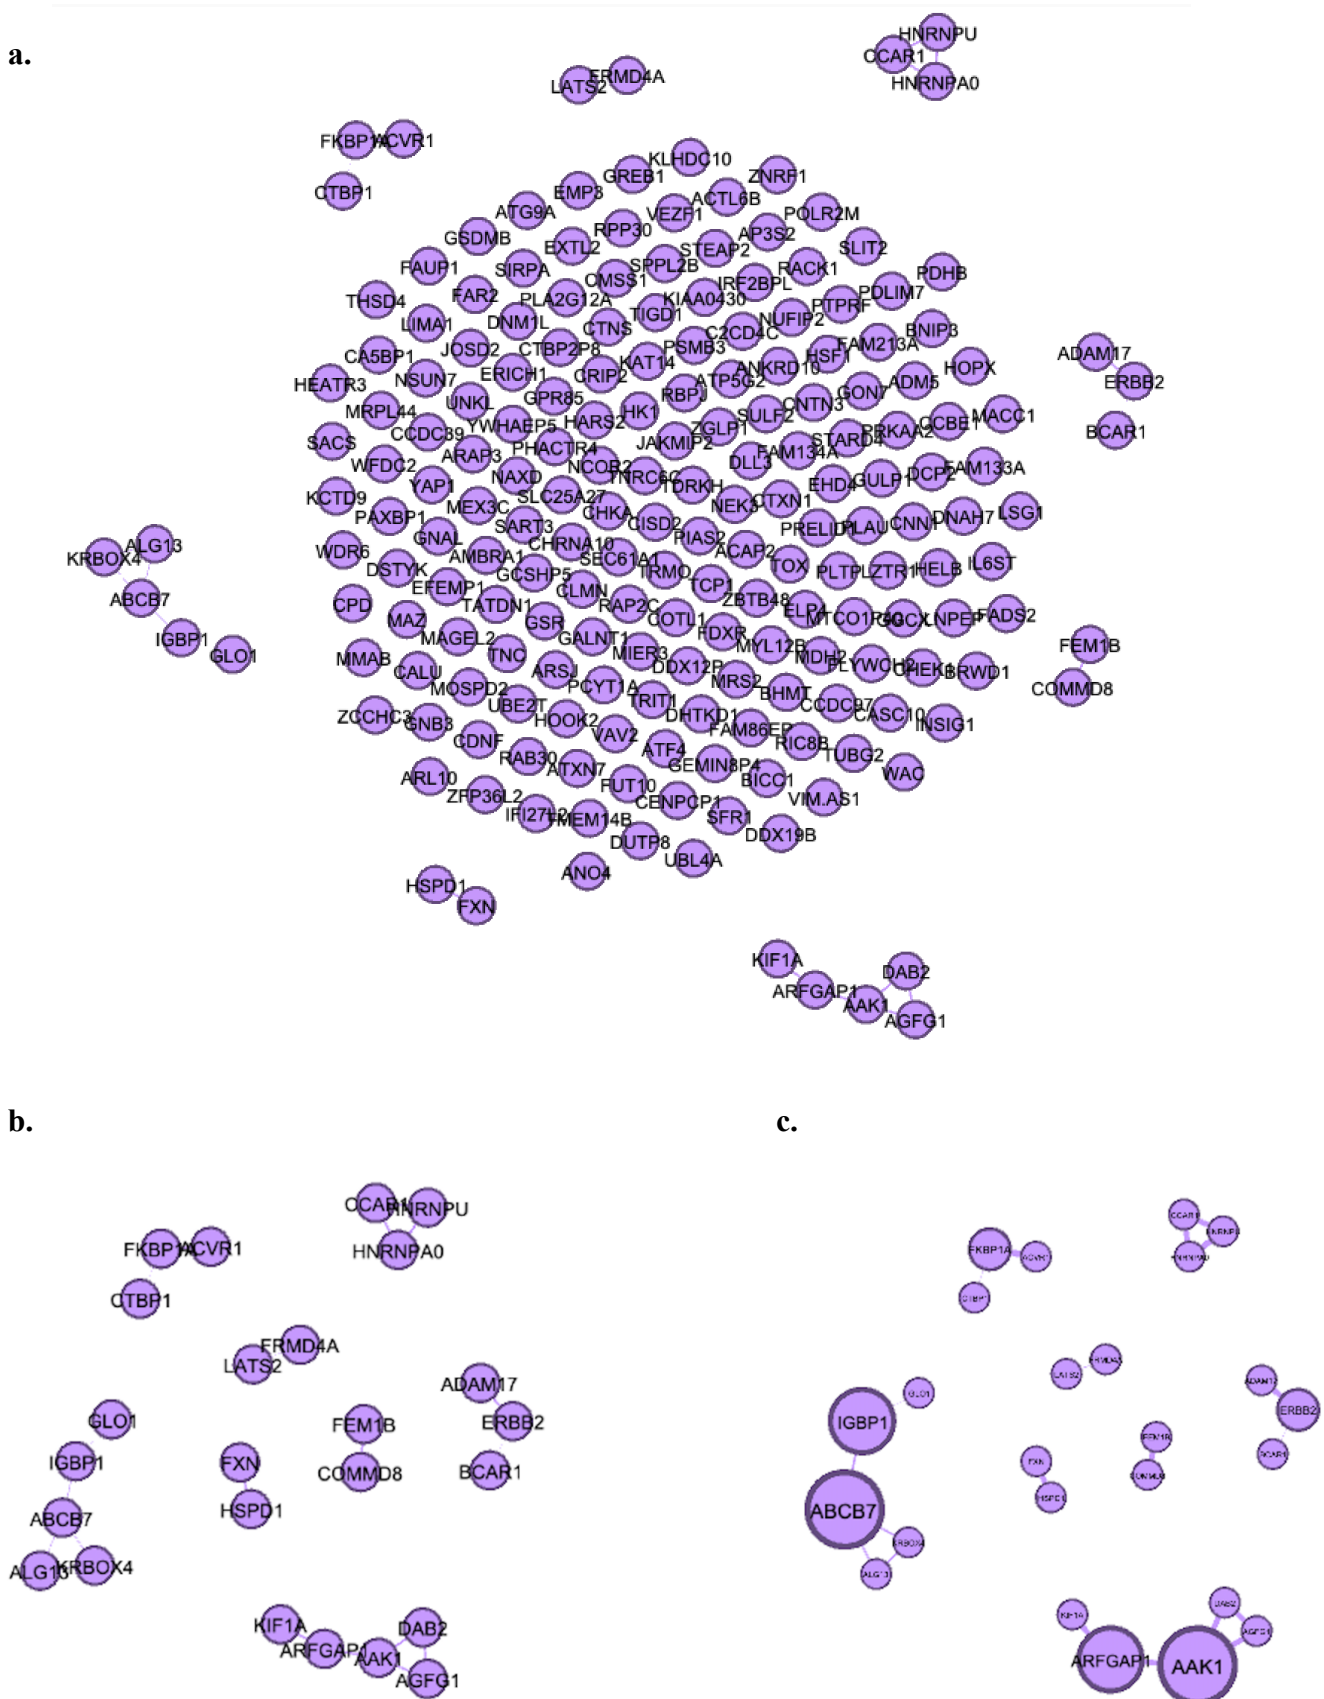

**Supplementary Figure 5. Network analysis performed on randomly selected genes using Gephi. a).** 200 randomly selected genes, processed the same way as DE genes. Central group consists of unconnected nodes. **b).** Unconnected nodes filtered out, only nodes with a connection to at least one other remain. **c).** Betweenness centrality applied, size reflects connectedness of nodes.

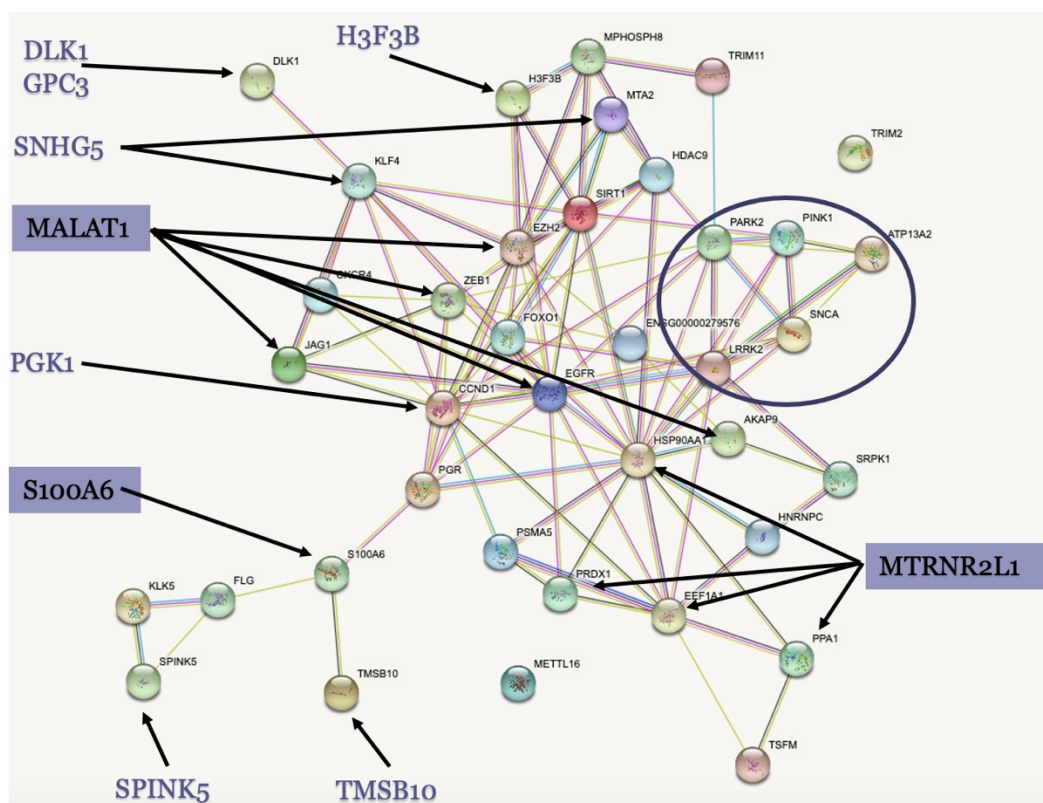

**Supplementary Figure 6. The network of genes dysregulated by the presence of the PINK1 mutation includes genes related to other PD-associated pathways, based on the STRING<sup>19</sup> database network.** GPC3<sup>20,21</sup> interact with the PD-associated gene DJ-1 (PARK7)<sup>11,12</sup>. The DEG network also includes genes of the LRRK2 (PARK8) network<sup>11,12</sup>, namely ENAH, HSPA8, MYL6, **MALAT1**, and **SNHG5**. SNHG5 and MALAT1 interact with LRRK2 via miR-205-5p<sup>44,45</sup>. **DLK1** and **MALAT1** mediate  $\alpha$ -synuclein accumulation<sup>22,23</sup>. In fact, the DLK1-NURR1 interaction involved in this process may be mDA neuron-specific<sup>24</sup>, highlighting the necessity to use mDA neurons for the study of PD-related pathways. SNHG5 and MALAT1 are not included in the protein-protein interaction-based network analysis, since they are RNA genes and do not code for proteins. The involvement of non-coding RNA is likely yet another layer of PD pathology.



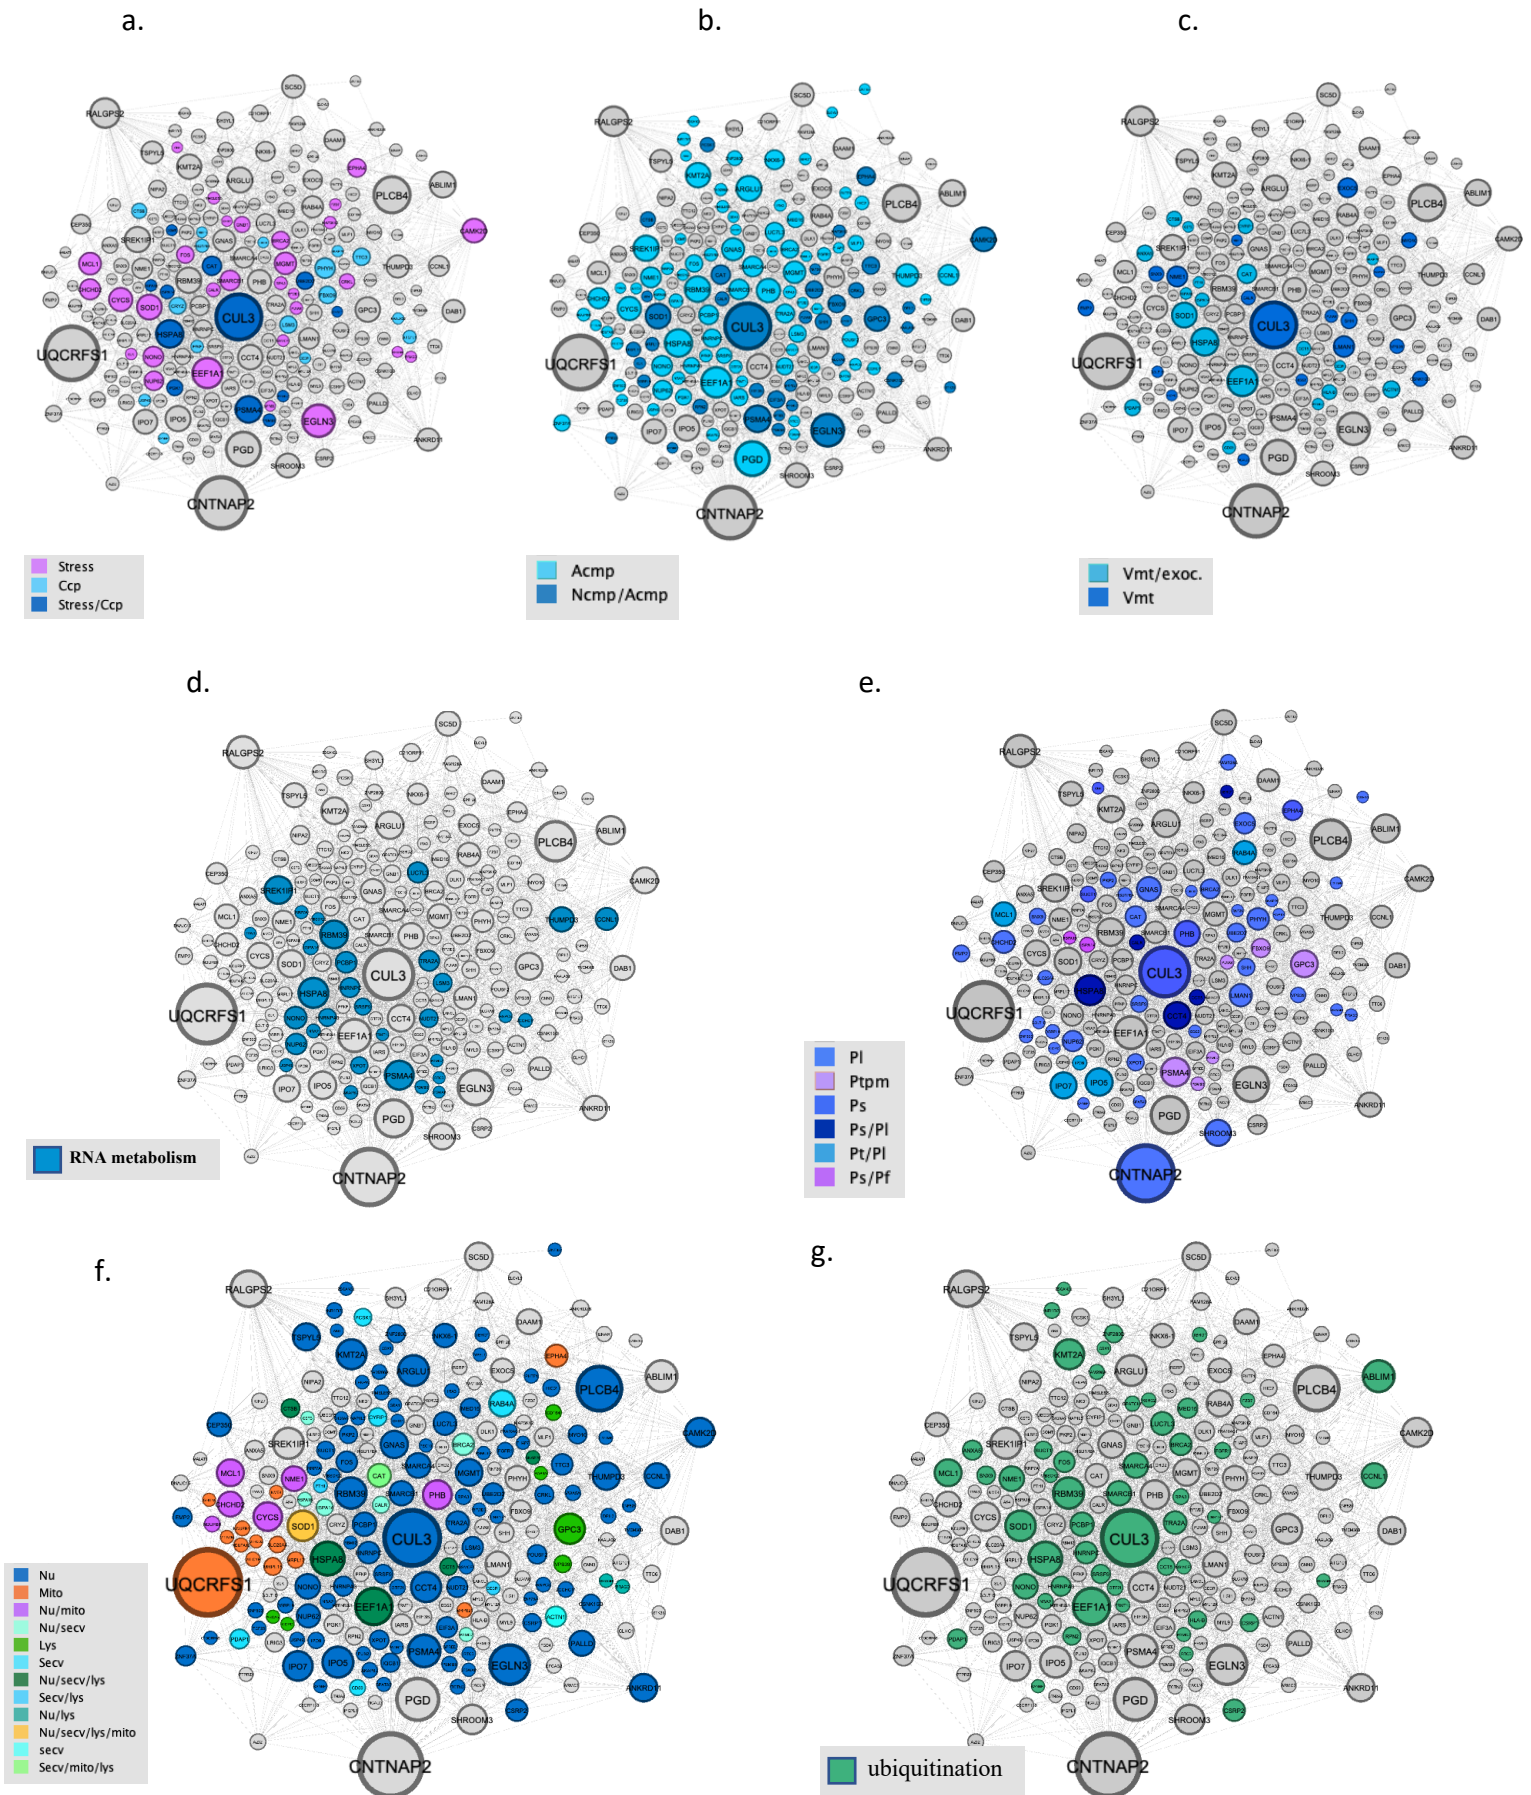

**Supplementary Figure 7. Functional pathways significantly represented in the network.** Functional pathways as obtained from String database. **a).** Reaction to stress, cell catabolic processes. **b).** nitrogen and aromatic compound metabolism. **c).** Vesicle mediated transport & exocytosis. **d).** RNA metabolism **e).** Protein metabolism. **f).** Localization. **g).** ubiquitination. (Supplementary Data 3). The network is based on 292 DEGs.

Abbreviations used in Supplementary Figure 7f.

|                        |                                                   |
|------------------------|---------------------------------------------------|
| <b>Acmp</b>            | aromatic compound metabolic process (par of Ncmp) |
| <b>ccp</b>             | cellular catabolic process                        |
| <b>exoc</b>            | exocytosis                                        |
| <b>lys</b>             | lysosome                                          |
| <b>mito</b>            | mitochondrial                                     |
| <b>Ncmp</b>            | nitrogen compound metabolic process               |
| <b>Nu</b>              | nucleus                                           |
| <b>Pf</b>              | protein folding                                   |
| <b>Pl</b>              | protein localization                              |
| <b>Pn-m</b>            | Metabolism of proteins                            |
| <b>Ps</b>              | protein stability                                 |
| <b>Pt</b>              | protein transporter                               |
| <b>Ptpm</b>            | post-translational protein modification           |
| <b>RNA<sub>m</sub></b> | Metabolism of RNA                                 |
| <b>RNA<sub>p</sub></b> | RNA processing                                    |
| <b>secv</b>            | secretory vesicle                                 |
| <b>stress</b>          | cellular response to stress                       |
| <b>Ubi</b>             | Ubl conjugation                                   |
| <b>Vmt</b>             | vesicle-mediated transport                        |

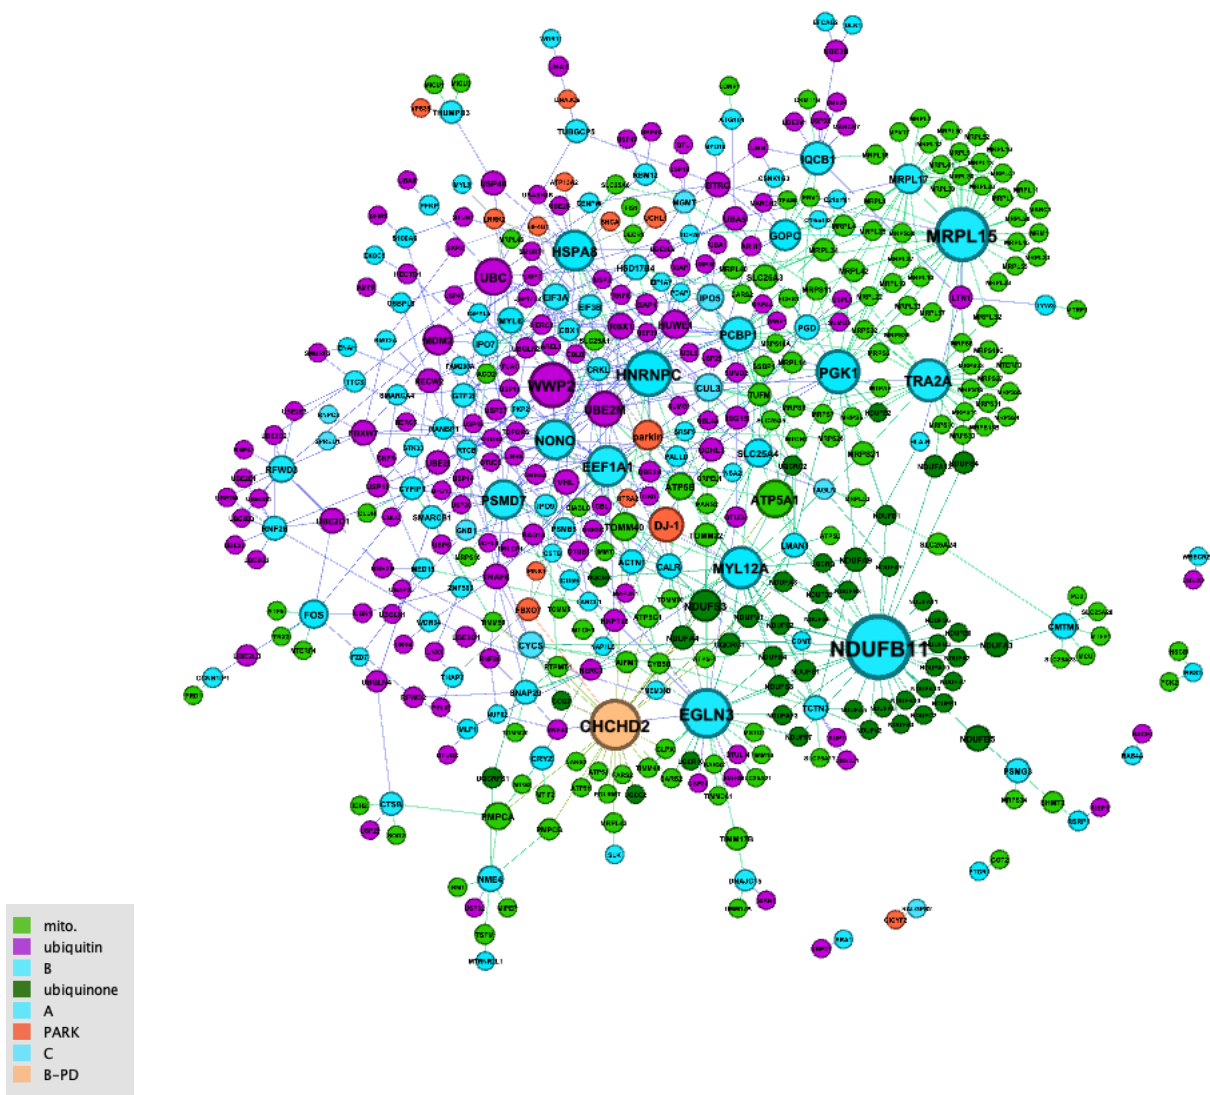

**Supplementary Figure 8. The interaction of genes from Groups A-C with ubiquitination and mitochondrial genes.** Only direct contacts of the differentially expressed genes (DEGs) in groups A-C were used. The graph illustrates which ubiquitination and mitochondrial genes the DEGs of the network interact with. DEGs are in light blue, ubiquitination genes they interact with are in purple, mitochondrial genes the DEGs interact with are in green and PARK genes are in orange. This figure illustrated that the DEGs interact with a vast array of ubiquitination and mitochondrial genes and that many of these interactions are common to other PARK genes, hence the effect of their differential expression, likely greatly impacts these networks, and that other PARK mutations have the capacity to impact the same network. The size of the nodes is based on the Betweenness Centrality calculation by the Gephi application, which roughly represents the connectedness of the node, hence the more nodes a particular node interacts with, the greater its size.



a.

- DE genes part of KEGG-PD pathway
- DE genes
- PARK genes

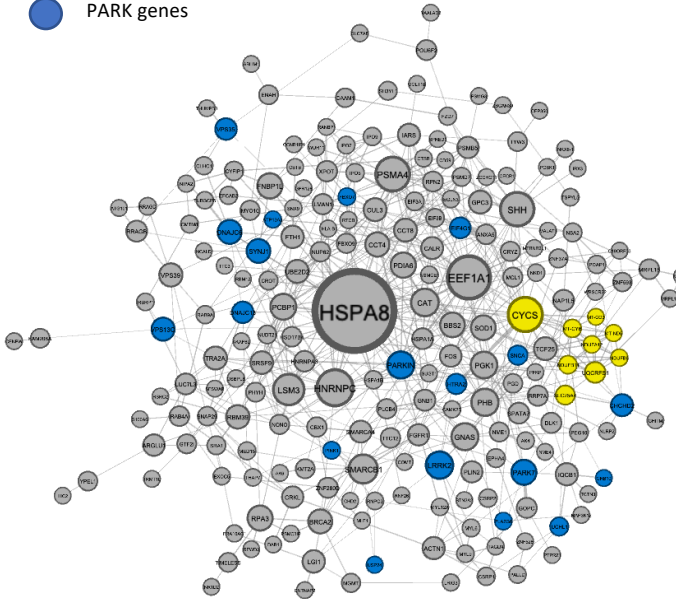

b.

- DE genes that directly interact with PARK genes
- DE genes
- PARK genes

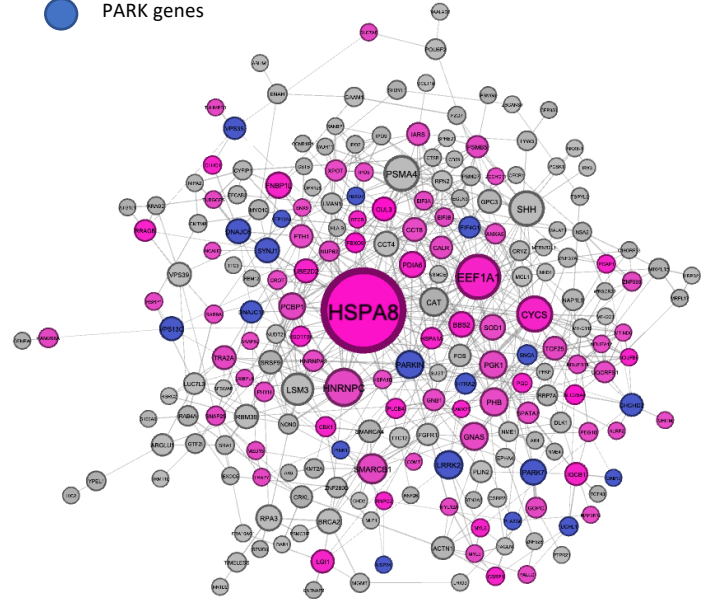

c.

- DE genes
- PARK genes

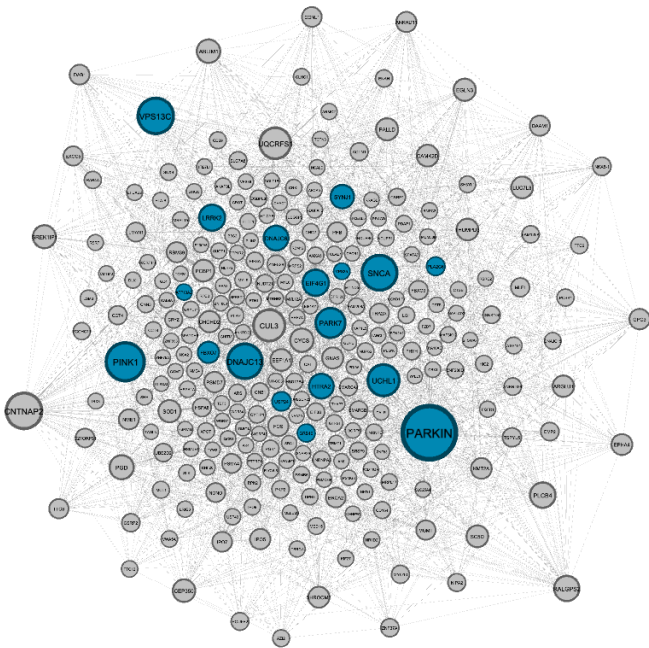

d.

- DE genes
- PARK genes
- DE genes that directly interact with PARK genes

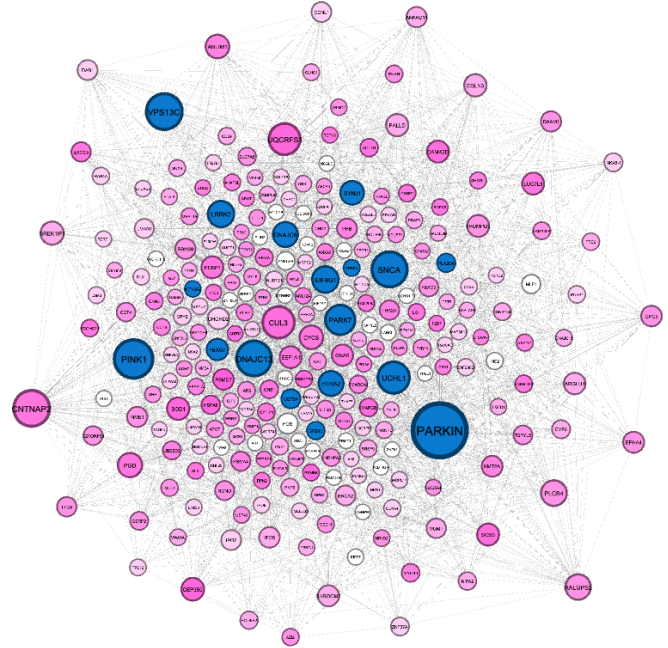

**Supplementary Figure 9. Parkinson-associated genes (PARK genes) integrated into the network.** Only direct interactions to genes known to be associated with PD (Supplementary Table 5) were included, so that only PD genes that directly interact with DE genes would be retained. The network is based on 292 DEGs. Figure a and b are based on STRING data, while c and d are based on GENEMANIA. The size of the nodes reflects the relative connectivity of that node to other DEGs, with larger nodes connected to more DEGs. **a).** PD genes as they integrate into the network through direct interactions with genes of the network. DE expressed genes that are part of the KEGG-PD pathway are highlighted in yellow **b).** The nearest DEG neighbour of each PARK gene was colored in pink. The darker the color, the more PARK genes the DE gene interacts with. HSPA8 is one of the most highly DE genes and also plays an important role in PD, it connects to several of the PARK genes. **c).** Interactions based on GeneMANIA. **d).** Genes that directly interact with PARK genes through interactions listed in GeneMANIA are colored in pink. The size of the

nodes is based on the Betweenness Centrality calculation by the Gephi application, which roughly represents the connectedness of the node, hence the more nodes a particular node interacts with, the greater its size.

a.

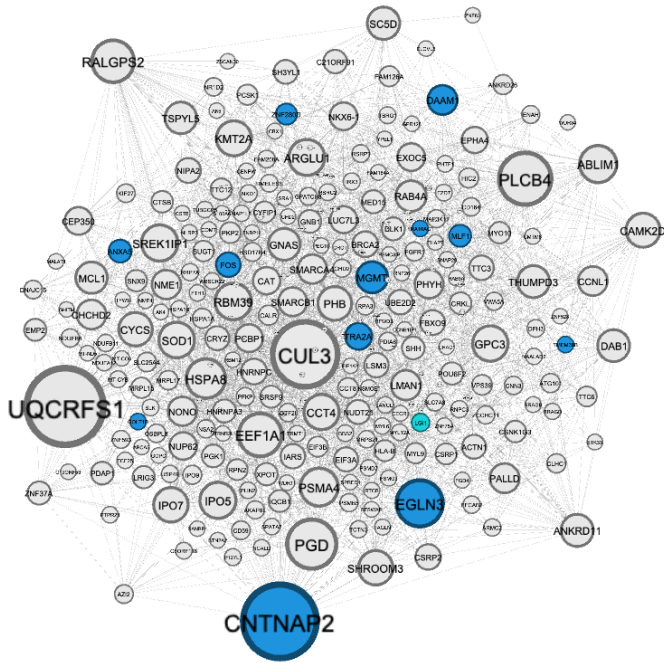

b.

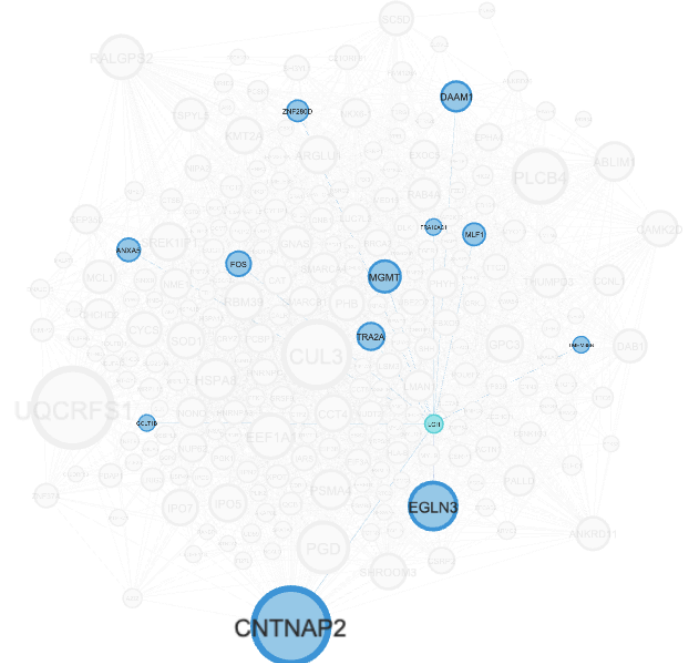

- DEGs
- LGI1
- DEGs directly connected to LGI1

- LGI1
- DEGs that interact directly with LGI1

**Supplementary Figure 10. Nearest neighbour of LGI1.** The network is based on 292 DEGs.

- a) LGI1<sup>25</sup> and its direct contacts, as seen within the DEG network.
- b) LGI1 and its direct contacts selected.

The size of the nodes is based on the Betweenness Centrality calculation by the Gephi application, which roughly represents the connectedness of the node, hence the more nodes a particular node interacts with, the greater its size.

| Alignment of sequenced fragment |                     |                                                                       |      |
|---------------------------------|---------------------|-----------------------------------------------------------------------|------|
| primer used: PINK1_cDNA2_fwd    | Query = NM_032409.2 | Sbjct = PCR fragment                                                  |      |
| Query                           | 924                 | TTCTCCGCGCCTTCACCTCTTCCGTGCCGCTGCTGCCAGGGCCCTGGTCGACTACCCTG           | 983  |
|                                 |                     |                                                                       |      |
| Sbjct                           | 1                   | TTCTCCGCGCCTTCACCTCTTCCGTGCCGCTGCTGCCAGGGCCCTGGTCGACTACCCTG           | 60   |
| Query                           | 984                 | ATGTGCTGCCCTCAGCCTCCACCCTGAAGGCCTGGGCCATGGCCGGACGCTGTTCTCTG           | 1043 |
|                                 |                     |                                                                       |      |
| Sbjct                           | 61                  | ATGTGCTGCCCTCAGCCTCCACCCTGAAGGCCTGGGCCATGGCCGGACGCTGTTCTCTG           | 120  |
| Query                           | 1044                | TTATGAAGAACTATCCCTGTACCCTGCGCCAGTACCTTTGTGTGAACACACCCAGCCCC           | 1103 |
|                                 |                     |                                                                       |      |
| Sbjct                           | 121                 | TTATGAAGAACTATCCCTGTACCCTGCGCCAGTACCTTTGTGTGAACACACCCAGCCCC           | 180  |
| Query                           | 1104                | GCCTCGCCGCCATGATGCTGCTGCAGCTGCTGGAAGGCGTGGACCATCTGGTTCAACAGG          | 1163 |
|                                 |                     |                                                                       |      |
| Sbjct                           | 181                 | GCCTCGCCGCCATGATGCTGCTGCAGCTGCTGGAAGGCGTGGACCATCTGGTTCAACAGG          | 240  |
| Query                           | 1164                | GCATCGCGCACAGAGACCTGAAATCCGACAACA <b>T</b> CCTTGTGGAGCTGGACCCAGACGGCT | 1223 |
|                                 |                     |                                                                       |      |
| Sbjct                           | 241                 | GCATCGCGCACAGAGACCTGAAATCCGACAACA <b>A</b> CCTTGTGGAGCTGGACCCAGACGGCT | 300  |
| Query                           | 1224                | GCCCTGGCTGGTGATCGCAGATTTTGGCTGCTGCCTGGCTGATGAGAGCATCGGCCTGC           | 1283 |
|                                 |                     |                                                                       |      |
| Sbjct                           | 301                 | GCCCTGGCTGGTGATCGCAGATTTTGGCTGCTGCCTGGCTGATGAGAGCATCGGCCTGC           | 360  |
| Query                           | 1284                | AGTTGCCCTTCAGCAGCTGGTACGTGGATCGGGGCGAAACGGCTGTCTGATGGCCCCAG           | 1343 |
|                                 |                     |                                                                       |      |
| Sbjct                           | 361                 | AGTTGCCCTTCAGCAGCTGGTACGTGGATCGGGGCGAAACGGCTGTCTGATGGCCCCAG           | 420  |
| Query                           | 1344                | AGGTGTCCACGGCCCGTCCTGGCCCCAGGGCAGTGATTGACTACAGCAAGGCTGATGCCT          | 1403 |
|                                 |                     |                                                                       |      |
| Sbjct                           | 421                 | AGGTGTCCACGGCCCGTCCTGGCCCCAGGGCAGTGATTGACTACAGCAAGGCTGATGCCT          | 480  |
| Query                           | 1404                | GGGCAGTGGGAGCCATCGCCTATGAAATCTTCGGGCTTGTCAATCCCTTCTA                  | 1455 |
|                                 |                     |                                                                       |      |
| Sbjct                           | 481                 | GGGCAGTGGGAGCCATCGCCTATGAAATCTTCGGGCTTGTCAATCCCTTCTA                  | 532  |

**Supplementary Figure 11. Sequencing results showing homozygosity of the PINK1 cell line for the ILE368ASN mutation.** This sequence has been deposited to NCBI under the accession OK050183.1



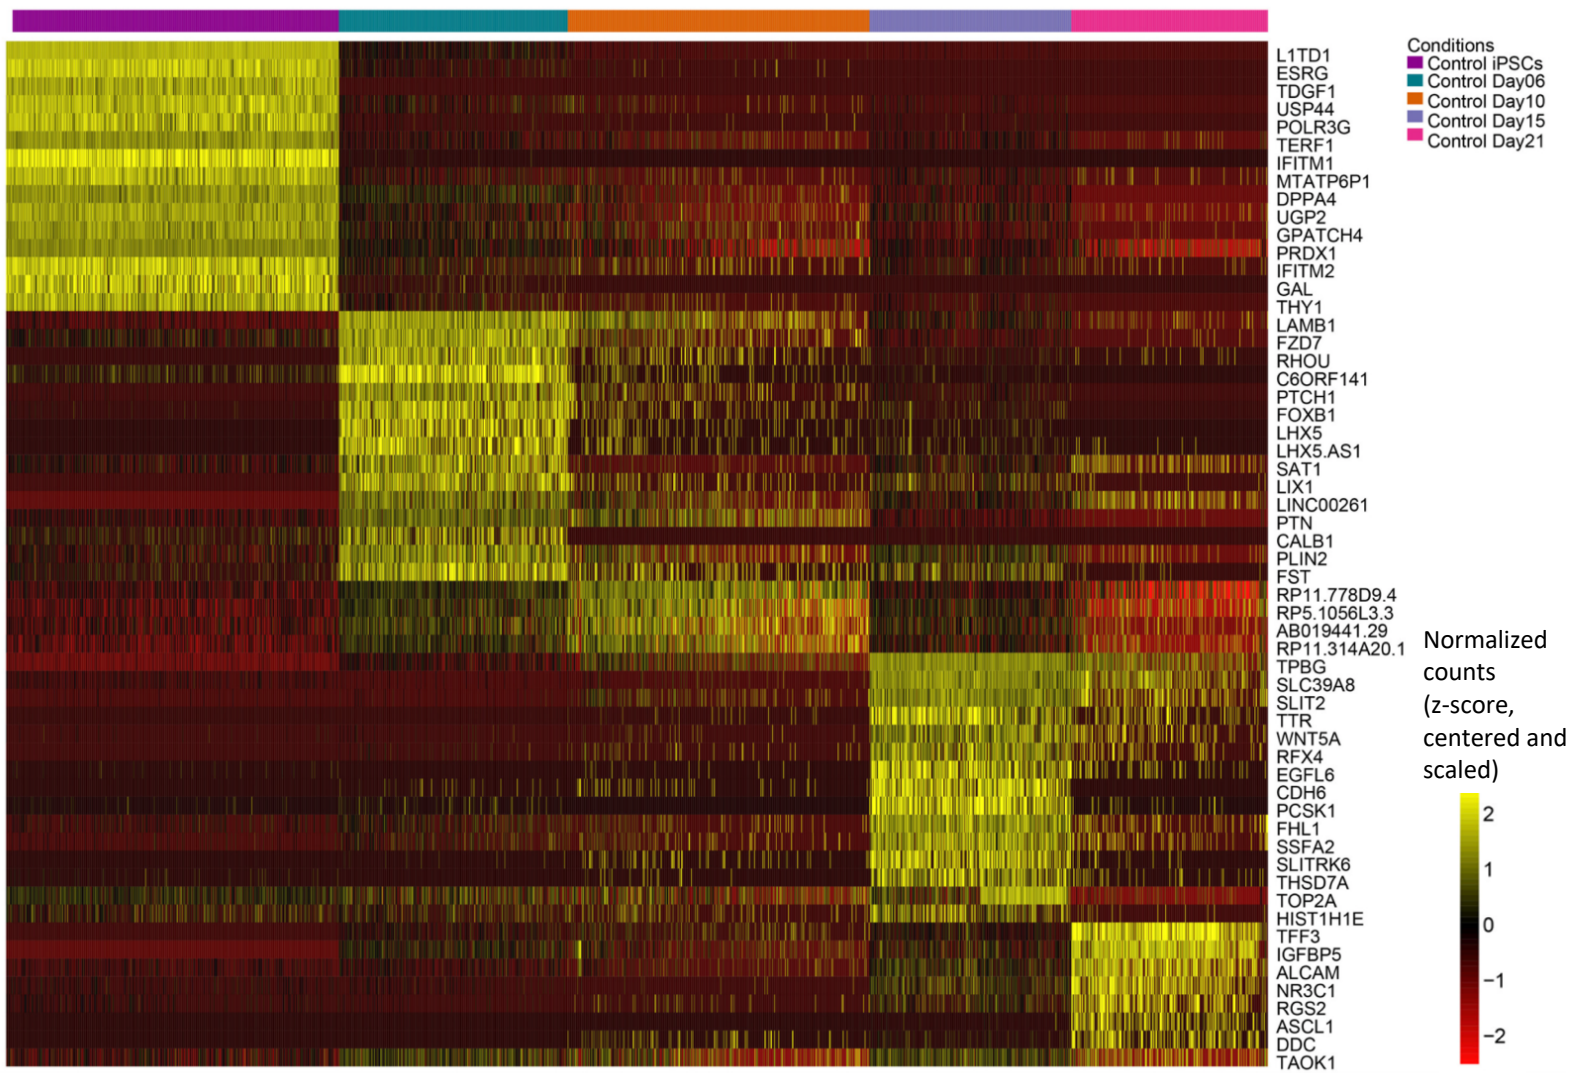

**Supplementary Figure 12. Heatmap showing a gradual transition of gene expression between differentiation stages.** Timepoints D0 (iPSCs), D6, D10, D15 and D21. As expected, D6 and D10 are quite similar, since there is only a small change in the differentiation factors the cells are exposed to (Supp. Table 1). The analysis is based on gene expression matrix of 4495 cells (39,194 genes). Colors correlate to normalized counts (z-score, centered and scaled) of indicated gene relative to the undifferentiated reference set, or for the iPSC group, relative to differentiated cells. As described in the text, expression of *TDGF-1*, *L1TD1*, *USP44*, *POLR3G*, *TERF1*, *IFITM1*, *DPPA4*, and *PRDX1* is associated with stemness.



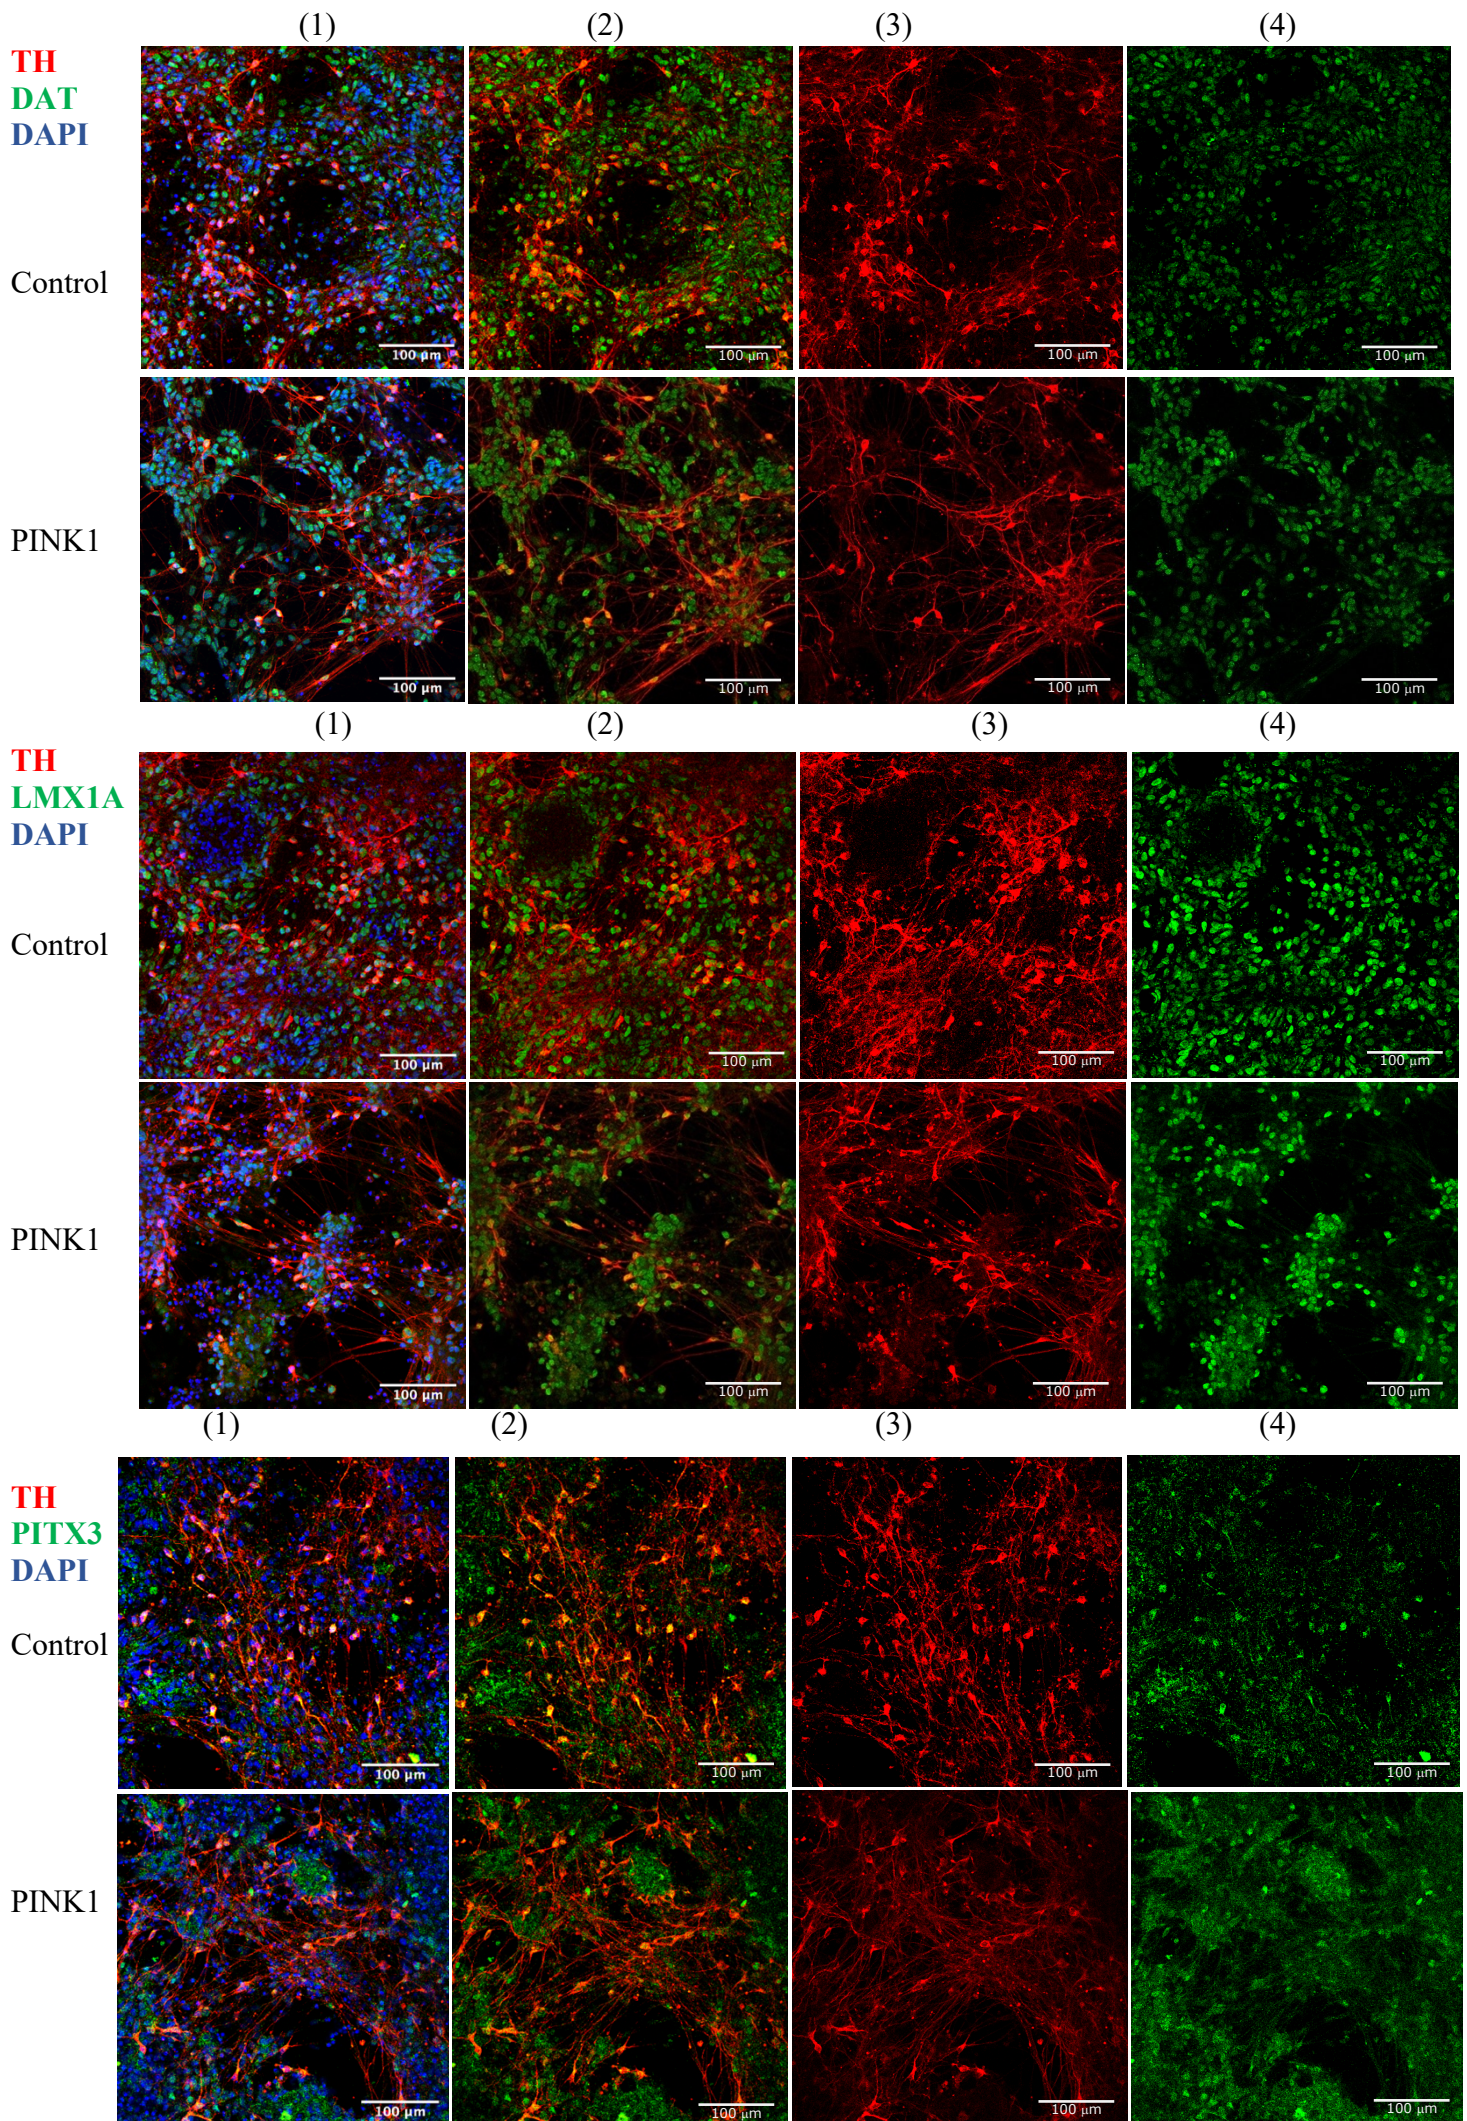

**Supplementary Figure 13. Staining images of PINK1 and control cell lines at D35.**

- (1) TH (red); DAT/LMX1A/PITX3 (green); DAPI (blue)
- (2) TH (red); DAT/LMX1A/PITX3 (green)
- (3) TH (red)
- (4) DAT/LMX1A/PITX3 (green)



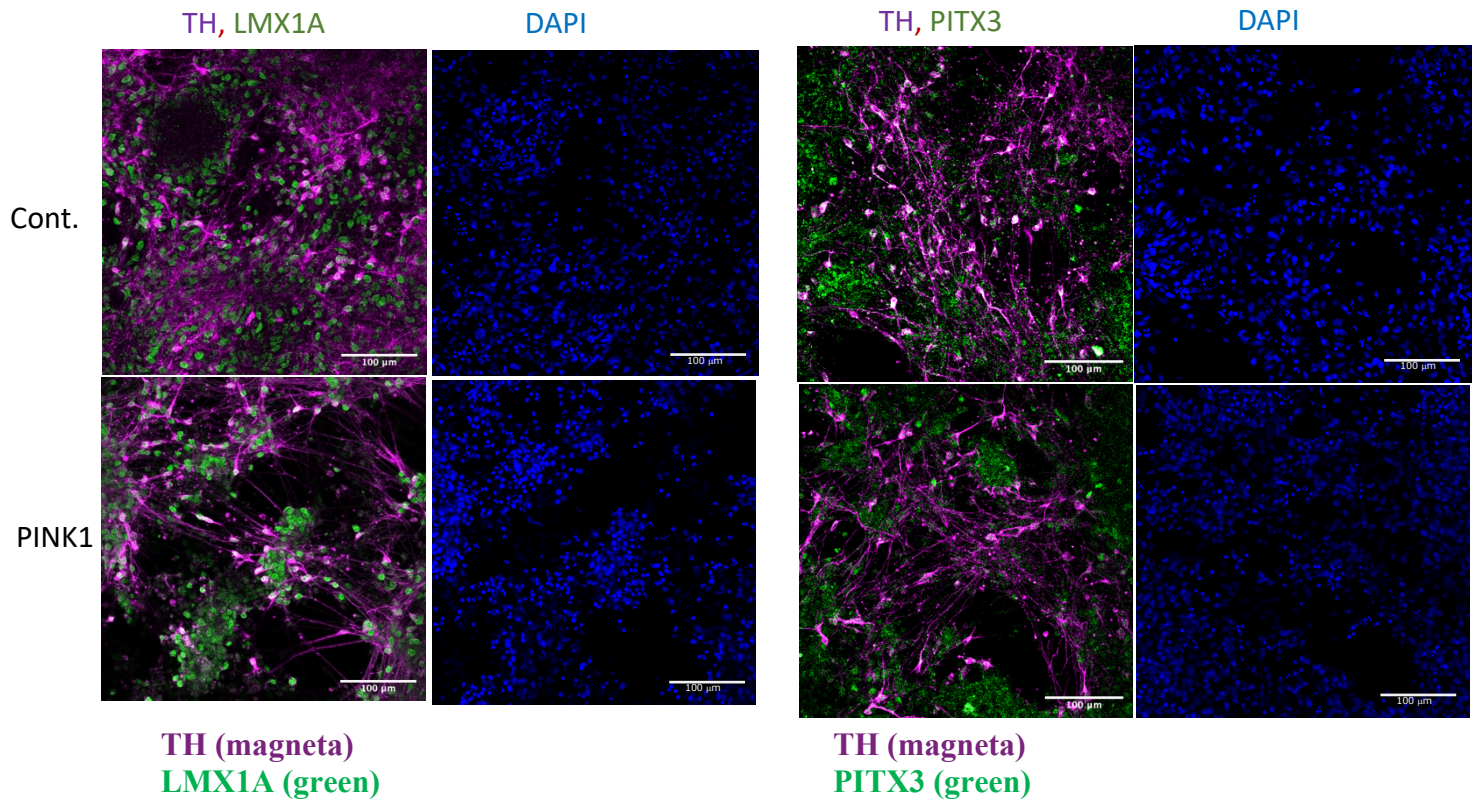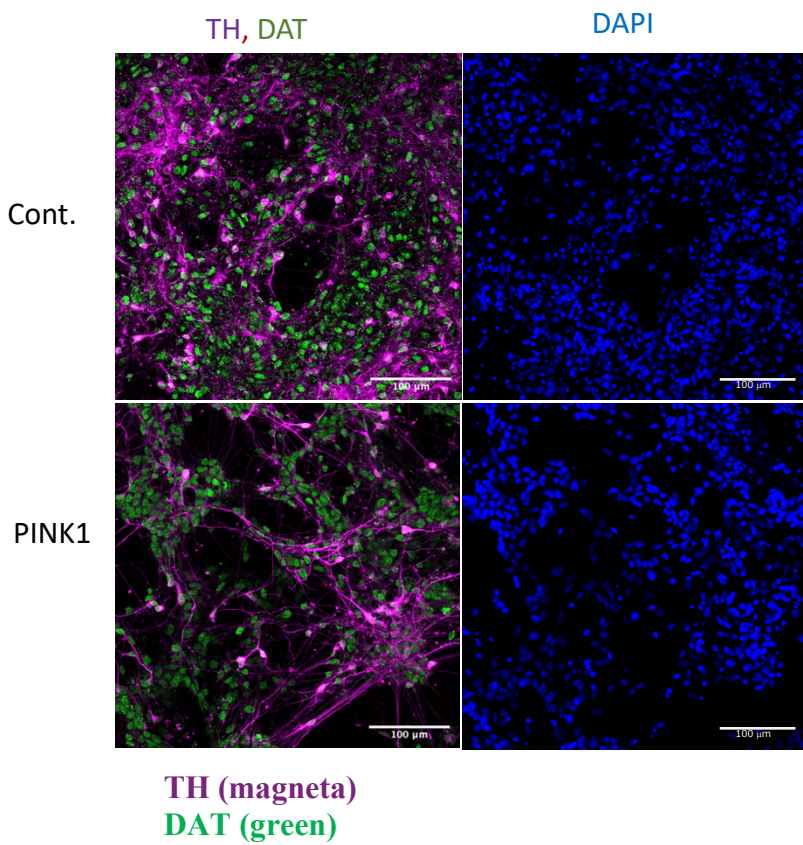

Supplementary Figure 14. images of PINK1 and control cell lines at D35 adapted using color blind-friendly palette.

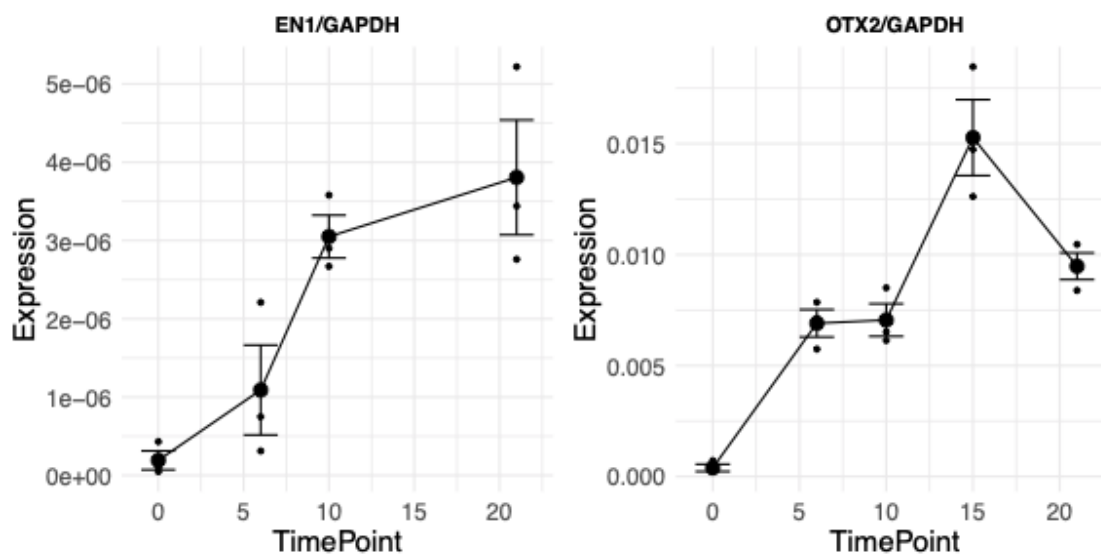

**Supplementary Figure 15. Expression of the transcription factor EN1 and OTX2.** Quantitation using absolute quantitation via qPCR and standardization to a housekeeping gene. Each timepoint represents three biological replicates, amplified in duplicate. Standard error (SE) bars are the SE of biological replicates. The expression levels are standardized to total RNA and to the expression of the housekeeping gene GAPDH. This illustrates why EN1 is not detected by SC-RNAseq, due to the loss of information regarding genes expressed at a low level as a result of data pre-processing. Input data is listed in Supplementary Data 7.



a.

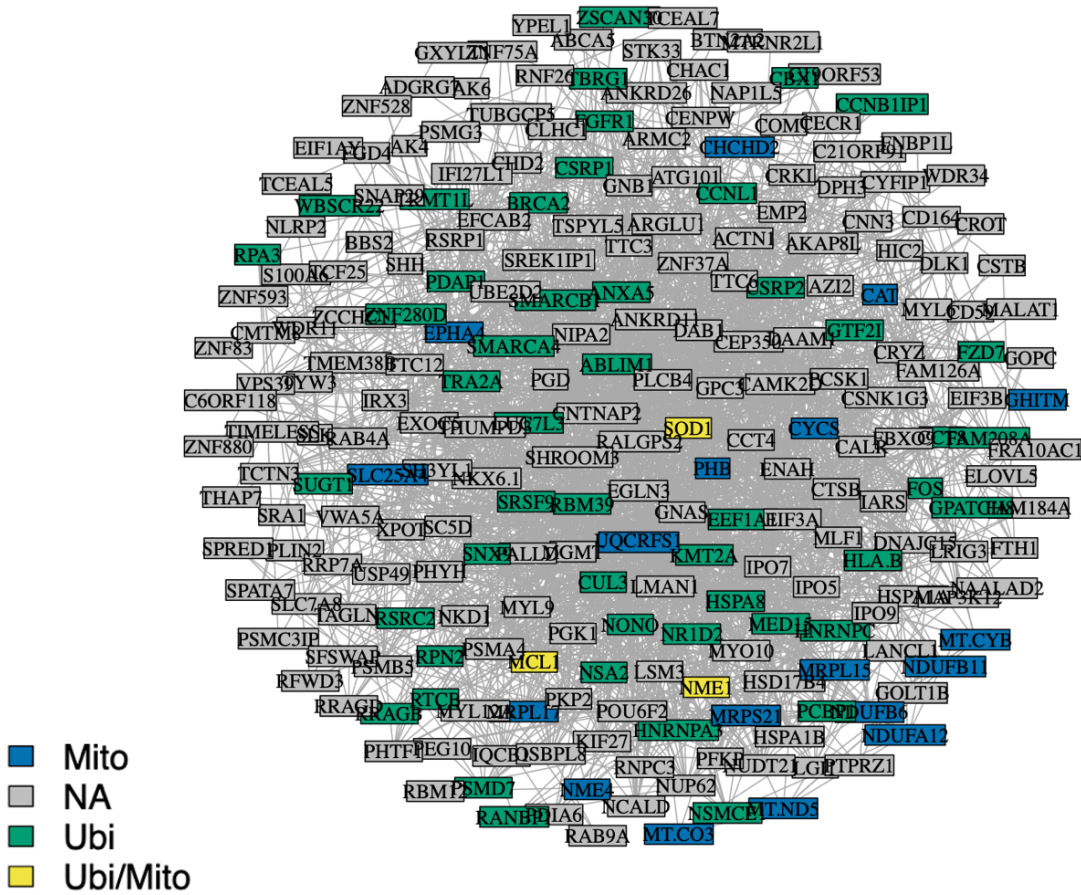

b.

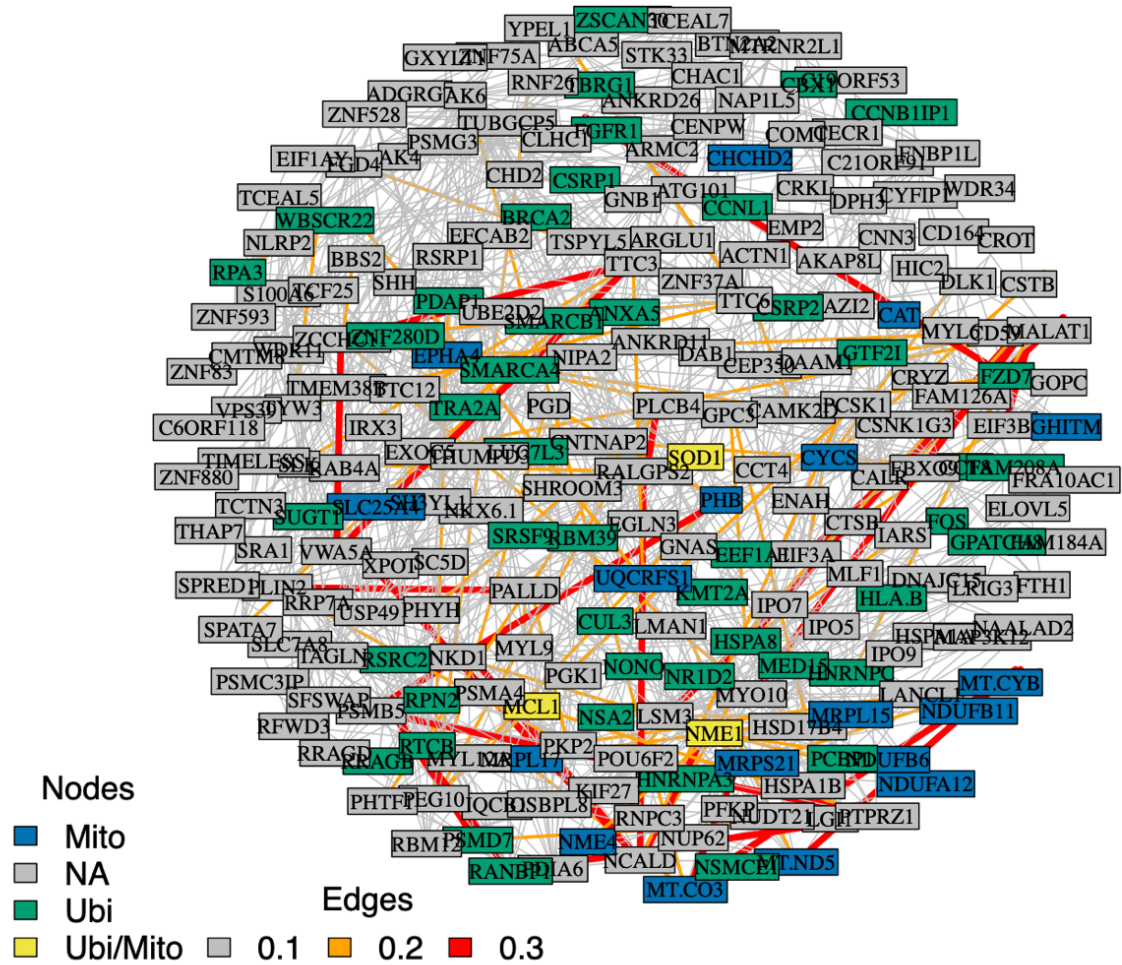

**Supplementary Figure 16. Network analysis.** a). Protein-protein interaction information obtained from the STRING and GeneMANIA databases. b). A correlation network based on the correlation of expression of DEGs ( $p$ -value < 0.05, correlation > 0.1). The analysis is based on gene expression matrix of 4495 cells (39,194 genes). The network is based on 292 DEGs.

a.

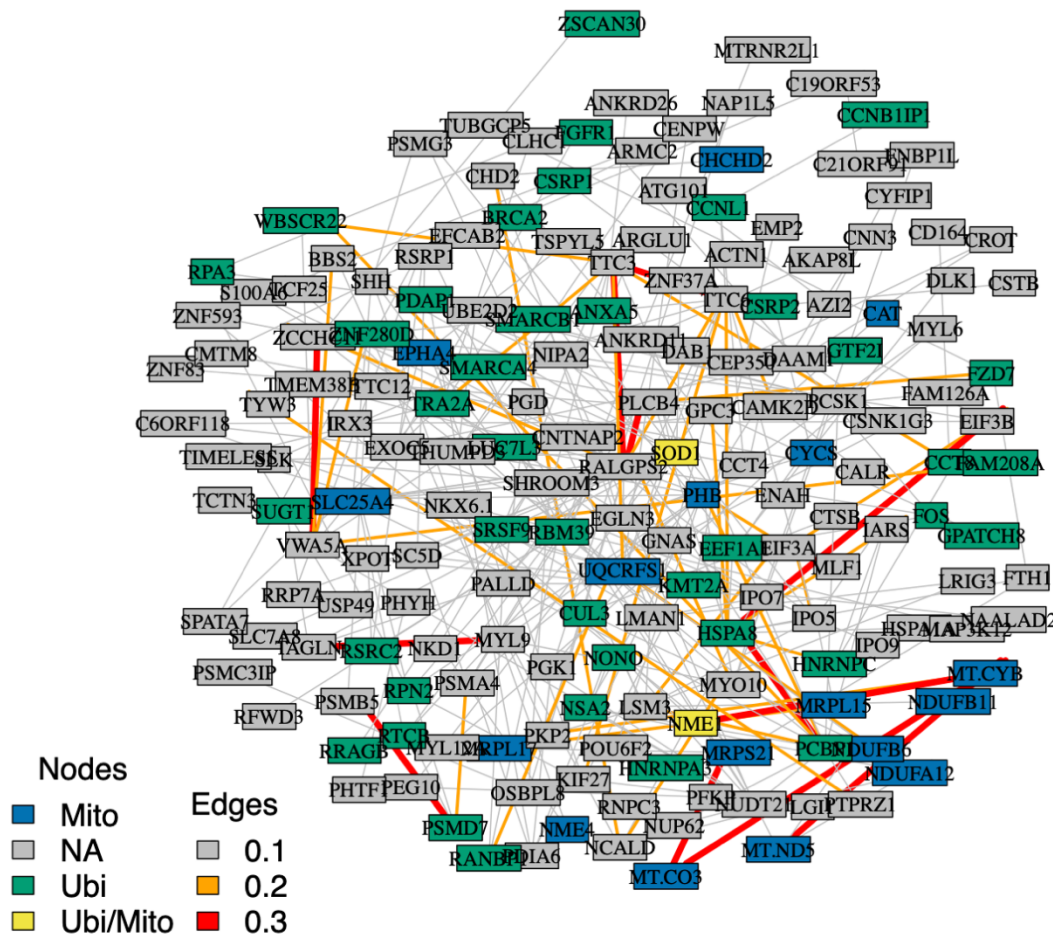

b.

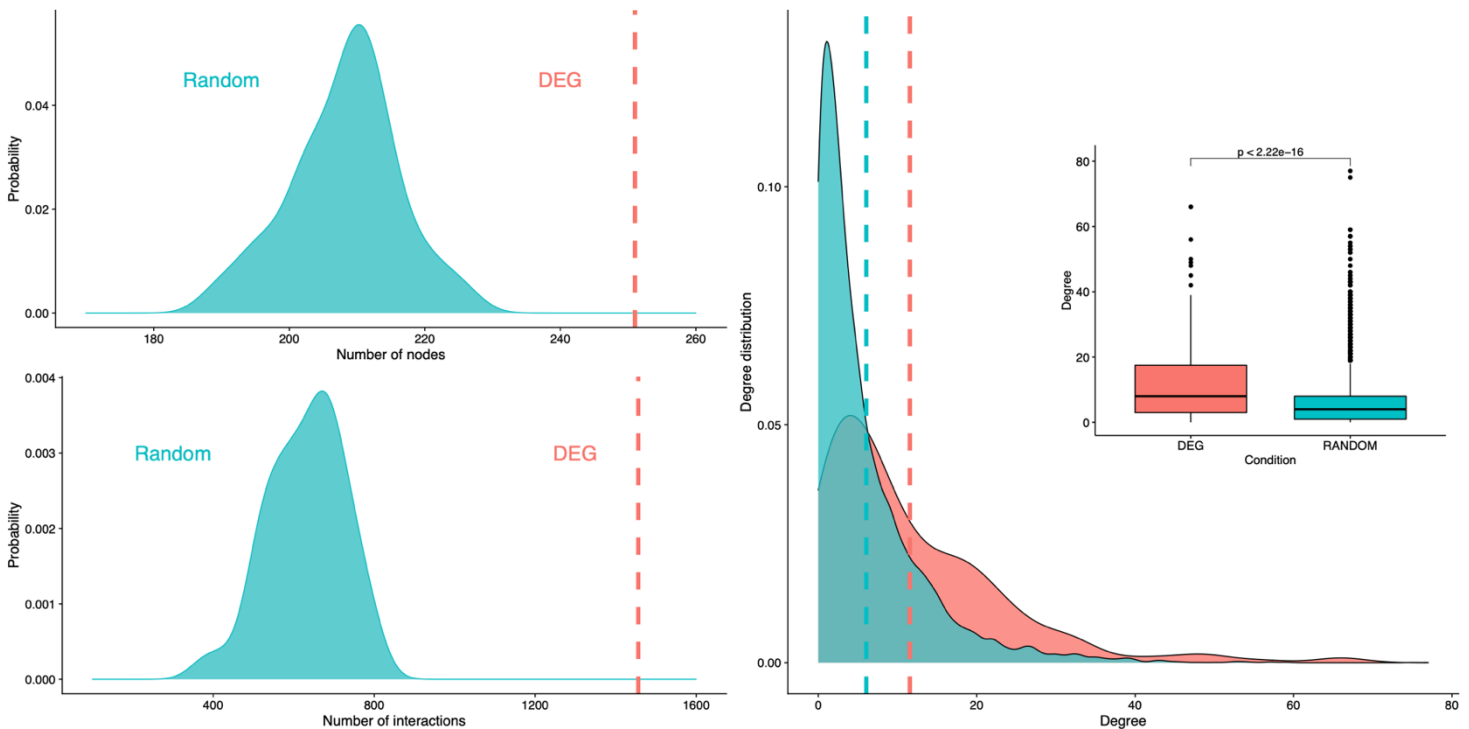

**Supplementary Figure 17. Network analysis.** **a).** We identified edges common between network a) and b). This network consists of 860 interactions. We then extracted shared interactions of these two networks, which yielded 297 interactions. **b).** In order to validate the PPI network produced by STIRNGdb (v10), we created 50 PPI (protein-protein interaction) networks using 292 random genes (same as the number of DEGs). We then compared the number of detected proteins, the number of interactions between the genes and the distribution of the node degrees. Box Plot depicts the number of degrees through their quartiles per group (Red: ppi network based on the differential expressed genes, Blue: ppi networks of random genes). Wilcoxon test performed to access if the two-degree distributions are different from one another in a statistically significant manner, which showed a statistically significant difference ( $p=2.22e-16$ ).

a.

## SERVICE REPORT

### YALE STEM CELL CENTER hESC/iPSC CORE FACILITY

Service requested: iPSC generation.

#### REPORT DETAIL

Dated: 11/20/2015

Mycoplasma Test: Negative

Description of Starting Somatic Cell Growth: Normal

Reprogramming description:

- Reprogramming factor delivery Method: Sendai virus

-IPSC Culture Conditions: iPSC clones were cultured in mTeSR medium on GFR-Matrigel coated plates, and passed by dispase.

| Cell Lines | iPSC clones    | # of vials | # of Shippment | Note    |
|------------|----------------|------------|----------------|---------|
| ND40066    | Clone-1        | 3          | 3              |         |
|            | Clone-2        | 3          | 3              |         |
|            | <b>Clone-8</b> | <b>3</b>   | <b>3</b>       |         |
|            | Clone-10       | 3          | 3              |         |
|            | Clone-18       | 3          | 3              |         |
|            | Clone 3        | 1          | 1              | Back up |
|            | Clone 4        | 1          | 1              |         |
|            | Clone 5        | 1          | 1              |         |

b.

| cell line                                    | Reading A  | Reading B | Ratio       |                        |  |
|----------------------------------------------|------------|-----------|-------------|------------------------|--|
| ND29542-7                                    | 223        | 178       | 0.80        | negative               |  |
| ND29542-3                                    | 253        | 135       | 0.53        | negative               |  |
| ND40996-10                                   | 185        | 66        | 0.36        | negative               |  |
| ND40996-7                                    | 348        | 115       | 0.33        | negative               |  |
| ND40996-1                                    | 160        | 58        | 0.36        | negative               |  |
| <b>ND40066-8</b>                             | <b>203</b> | <b>72</b> | <b>0.35</b> | <b>negative</b>        |  |
| ND40066-7                                    | 203        | 59        | 0.29        | negative               |  |
| ND40066-2                                    | 285        | 65        | 0.23        | negative               |  |
| ND34267-8                                    | 205        | 125       | 0.61        | negative               |  |
| -C (buffer)                                  | 623        | 57        | 0.09        | negative               |  |
| +C (kit)                                     | 436        | 33057     | 75.82       | positive               |  |
|                                              |            |           |             | less than 1 = negative |  |
| MycoAlert™ Assay Control Set LT07-518        |            |           |             |                        |  |
| MycoAlert™ Mycoplasma Detection Kit LT07-418 |            |           |             |                        |  |

**Supplementary Figure 18. Mycoplasma testing report. a.** Mycoplasma testing report generated after the initial reprogramming of the iPSC clones by the Yale Stem Cell Center Core Facility. **b.** The ND40088 clone 8 passage 15 (expanded from cells used in our experiments) was most recently tested for mycoplasma on 20.4.2021. -C is negative control (buffer only), +C is a positive control provided of the MycoAlert Control Set.

## SUPPLEMENTARY REFERENCES

1. Tomishima, M. Midbrain dopamine neurons from hESCs. *StemBook* (2014) doi:10.3824/stembook.1.70.1.
2. Kriks, S. *et al.* Dopamine neurons derived from human ES cells efficiently engraft in animal models of Parkinson's disease. *Nature* (2011) doi:10.1038/nature10648.
3. Kriks, S. *et al.* Floor plate-derived dopamine neurons from hESCs efficiently engraft in animal models of PD. *Nature* (2012) doi:10.1038/nature10648.Floor.
4. Blaess, S. & Ang, S. L. Genetic control of midbrain dopaminergic neuron development. *Wiley Interdisciplinary Reviews: Developmental Biology* (2015) doi:10.1002/wdev.169.
5. Ang, S. L. Transcriptional control of midbrain dopaminergic neuron development. *Development* (2006) doi:10.1242/dev.02501.
6. Björklund, A. & Dunnett, S. B. Dopamine neuron systems in the brain: an update. *Trends in Neurosciences* (2007) doi:10.1016/j.tins.2007.03.006.
7. Tiklová, K. *et al.* Single-cell RNA sequencing reveals midbrain dopamine neuron diversity emerging during mouse brain development. *Nat. Commun.* (2019) doi:10.1038/s41467-019-08453-1.
8. Hegarty, S. V., Sullivan, A. M. & O'Keefe, G. W. Midbrain dopaminergic neurons: A review of the molecular circuitry that regulates their development. *Developmental Biology* (2013) doi:10.1016/j.ydbio.2013.04.014.
9. Arenas, E., Denham, M. & Villaescusa, J. C. How to make a midbrain dopaminergic neuron. *Dev.* (2015) doi:10.1242/dev.097394.
10. Ásgrímsdóttir, E. S. & Arenas, E. Midbrain Dopaminergic Neuron Development at the Single Cell Level: In vivo and in Stem Cells. *Frontiers in Cell and Developmental Biology* (2020) doi:10.3389/fcell.2020.00463.
11. Klein, C. & Westenberger, A. Genetics of Parkinson's disease. *Cold Spring Harb. Perspect. Med.* (2012) doi:10.1101/cshperspect.a008888.
12. Puschmann, A. New Genes Causing Hereditary Parkinson's Disease or Parkinsonism. *Current Neurology and Neuroscience Reports* (2017) doi:10.1007/s11910-017-0780-8.
13. Kirola, L., Behari, M., Shishir, C. & Thelma, B. K. Identification of a novel homozygous mutation Arg459Pro in SYNJ1 gene of an Indian family with autosomal recessive juvenile Parkinsonism. *Park. Relat. Disord.* (2016) doi:10.1016/j.parkreldis.2016.07.014.
14. Quadri, M. *et al.* Mutation in the SYNJ1 gene associated with autosomal recessive, early-onset parkinsonism. *Hum. Mutat.* (2013) doi:10.1002/humu.22373.
15. Olgiati, S. *et al.* PARK20 caused by SYNJ1 homozygous Arg258Gln mutation in a new Italian family. *Neurogenetics* (2014) doi:10.1007/s10048-014-0406-0.
16. Funayama, M. *et al.* CHCHD2 mutations in autosomal dominant late-onset Parkinson's disease: A genome-wide linkage and sequencing study. *Lancet Neurol.* (2015) doi:10.1016/S1474-4422(14)70266-2.
17. Lesage, S. *et al.* Loss of VPS13C Function in Autosomal-Recessive Parkinsonism Causes Mitochondrial Dysfunction and Increases PINK1/Parkin-Dependent Mitophagy. *Am. J. Hum. Genet.* (2016) doi:10.1016/j.ajhg.2016.01.014.
18. Tomishima, M. *StemBook*. (Harvard Stem Cell Institute, 2012). doi:10.3824/stembook.1.70.1.
19. Szklarczyk, D. *et al.* STRING v11: Protein-protein association networks with increased coverage, supporting functional discovery in genome-wide experimental datasets. *Nucleic Acids Res.* (2019) doi:10.1093/nar/gky1131.
20. Qiu, B. *et al.* DJ-1 promotes development of DEN-induced hepatocellular carcinoma and proliferation of liver cancer cells. *Oncotarget* (2017) doi:10.18632/oncotarget.14293.
21. Rouillard, A. D. *et al.* The harmonizome: a collection of processed datasets gathered to serve and mine knowledge about genes and proteins. *Database (Oxford)*. (2016) doi:10.1093/database/baw100.
22. Oliveira, L. M. A. *et al.* Elevated  $\alpha$ -synuclein caused by SNCA gene triplication impairs neuronal differentiation and maturation in Parkinson's patient-derived induced pluripotent stem cells. *Cell Death Dis.* (2015) doi:10.1038/cddis.2015.318.
23. Cruz-Monteagudo, M. *et al.* Efficient and biologically relevant consensus strategy for Parkinson's disease gene prioritization. *BMC Med. Genomics* (2016) doi:10.1186/s12920-016-0173-x.
24. Volakakis, N. *et al.* Nurr1 and retinoid X receptor ligands stimulate ret signaling in dopamine neurons

and can alleviate  $\alpha$ -synuclein disrupted gene expression. *J. Neurosci.* (2015)  
doi:10.1523/JNEUROSCI.1155-15.2015.

25. Kurtis, M. M., Toledano, R., García-Morales, I. & Gil-Nagel, A. Immunomodulated parkinsonism as a presenting symptom of LGI1 antibody encephalitis. *Parkinsonism and Related Disorders* (2015)  
doi:10.1016/j.parkreldis.2015.08.014.
